# Supplementary material for: Comparison of pediatric scoring systems for mortality in septic patients and the impact of missing information on their predictive power: a retrospective analysis
Source: PeerJ. 2020 Oct 5;8:e9993. doi: 10.7717/peerj.9993 (PMC7543722; doi:10.7717/peerj.9993)
Supplement: Supplemental Information 2 [file peerj-08-9993-s002.xlsx]

## Sheet: Tabelle1
Age [months]	Gender [female=1/male=0]	Underlying disease: central nervous system	Underlying disease: cardiovascular	Underlying disease: Skin	Underlying disease: respiratory system	Underlying disease: digestive tract	Undrelying disease: kidney	Underlying disease: liver	Underlying disaese: oncologic	Underlying disease: other	Survivor [yes=1 / no=0]	Thromboembolic events [yes=1 / no=0]	Bleedings events [yes=1 / no=0]	Creatinine [mg/dl]	Bilirubin [mg/dl]	D-dimer [µg/l]	Fibrinogen [mg/dl]	Antithrombin [%]	aPTT [sec]	PT [%]	C-reactive Protein [mg/dl]	Procalcitonin [mg/dl]	Hemoglobin [g/l]	Platelets [G/l]	Neutrophils [G/l]	Interleukin 6 [ng/l]	Leukocytes [G/l]	Base excess (arterial)	PIM Admission (PICU) predicted mortality	PIM Admission (PICU) missing values	PIM CRP-peak predicted mortality	PIM CRP-peak missing values	PIM2 Admission (PICU) predicted mortality	PIM2 Admission (PICU) missing values	PIM2 CRP-peak predicted mortality	PIM2 CRP-peak missing values	PIM3 Admission (PICU) predicted mortality	PIM3 Admission (PICU) missing values	PIM3 CRP-peak predicted mortality	PIM3 CRP-peak missing values	PRISM Admission (PICU) predicted mortality	PRISM Admission (PICU) missing values	PRISM CRP-peak predicted mortality	PRISM CRP-peak missing values	PRISM-III Admission (PICU) predicted mortality	PRISM-III Admission (PICU) missing values	PRISM-III CRP-peak predicted mortality	PRISM-III CRP-peak missing values	PRISM-IV Admission (PICU) predicted mortality
0	0	0	1	0	1	0	0	0	0	1	1	0	0	0.67		2221	591	36	53	108	12.52			42	6.2		12.3	-5.4	0.03	0.5714	0.03	0.5714	0.028	0.4	0.028	0.4	0.0798	0.3333	0.0798	0.3333	0.0083	0.8667	0.0083	0.8667	0.0053	0.6875	0.0053	0.6875	0.0022
0	1	1	0	0	0	0	0	0	0	0	1	0	0	0.7							6.01			198	4.4		11.1
0	1	0	1	0	1	1	0	0	0	1	1	0	0								0.49		144	233	37.4	650.4	58.5	-7.2	0.055251	0	0.055251	0	0.063851	0	0.063851	0	0.0546923	0	0.0546923	0	0.0281953	0.466667	0.0281953	0.466667	0.000480597	0.4375	0.000480597	0.4375	0.00118125
0	0	1	0	0	1	0	0	0	0	1	0	0	1		5.3						11.98		113	25	29.5	1070	39.4	-12.1	0.0547123	0.142857	0.0547123	0.142857	0.295754	0.1	0.295754	0.1	0.222562	0.0833333	0.222562	0.0833333	0.157493	0.466667	0.157493	0.466667	0.0552005	0.5	0.0552005	0.5	0.0232029
0	1	0	1	0	1	0	0	0	0	0	1	0	0		1.2						0.66		165	332	5.4	118.6	16.9	-5	0.0414672	0.285714	0.0414672	0.285714	0.0484804	0.2	0.0484804	0.2	0.041154	0.166667	0.041154	0.166667	0.018817	0.533333	0.018817	0.533333	0.000480597	0.5625	0.000480597	0.5625	0.000480597
0	1	0	0	0	1	1	0	0	0	1	1	0	0		4.2						0.32	7.04	179	273	21.4	32.7	23.3	-3.1	0.0912376	0.142857	0.0912376	0.142857	0.0614293	0.1	0.0614293	0.1	0.0566437	0.0833333	0.0566437	0.0833333	0.157493	0.2	0.157493	0.2	0.00118125	0.25	0.000480597	0.25	0.00118125
0	0	1	1	0	1	1	0	0	0	1	1	0	1								0.08		152	195	2.7	257	7.8	-5.4	0.0133578	0	0.0133578	0	0.0144944	0	0.0144944	0	0.0191026	0	0.0191026	0	0.0344563	0.533333	0.0344563	0.533333	0.00391117	0.5	0.00391117	0.4375	0.00527231
0	1	0	0	0	1	0	0	0	0	0	1	0	0		5.8						0.21		141	169	0.7	714.7	9.6	-7.3	0.0996966	0.285714	0.0996966	0.285714	0.347873	0.2	0.347873	0.2	0.565762	0.166667	0.565762	0.166667	0.0755084	0.533333	0.0755084	0.533333	0.125648	0.5	0.125648	0.5	0.125648
0.0333333	1	0	0	0	0	0	0	0	0	1	1	0	0		3.3						2.9		181	204	7.9	11.8	16.9	-9.6	0.0371798	0.142857	0.00811333	0.142857	0.0413561	0.1	0.0167659	0.1	0.0371201	0.0833333	0.0220193	0.0833333	0.0281953	0.466667	0.0125179	0.466667	0.00118125	0.5625	0.00118125	0.5625	0.00118125
0.0333333	0	0	1	0	0	0	0	0	0	1	1	0	0								1.84		150	340	9.6	20.7	14		0.0075923	0.428571	0.0075923	0.571429	0.00750912	0.3	0.00750912	0.4	0.011055	0.25	0.011055	0.333333	0.0083096	0.733333	0.0083096	0.8	0.000480597	0.6875	0.000480597	0.75	0.000480597
0.0333333	1	0	0	0	1	0	0	1	0	0	1	0	0								1.05		122	283	13.1	23.2	25.6		0.0284429	0.428571	0.0284429	0.428571	0.00850508	0.2	0.0279524	0.3	0.0288195	0.25	0.0288195	0.25	0.0083096	0.8	0.0083096	0.8	0.000480597	0.75	0.000480597	0.75	0.000480597
0.0333333	0	0	0	0	0	0	0	0	0	0	1	0	0								4			182	59	145	20.1		0.246146	0.142857	0.246146	0.142857	0.294386	0.1	0.294386	0.1	0.550861	0.0833333	0.550861	0.0833333	0.344795	0.466667	0.344795	0.466667	0.0552005	0.5	0.0552005	0.5	0.0552005
0.0333333	0	0	0	0	0	0	0	0	0	0	1	0	0		7.5						2.99			219			14.5		0.0075923	0.571429	0.0075923	0.571429	0.00750912	0.4	0.00750912	0.4	0.011055	0.333333	0.011055	0.333333	0.0083096	0.666667	0.0420474	0.666667	0.000480597	0.6875	0.000480597	0.6875	0.000480597
0.0333333	0	0	0	0	0	0	0	0	0	0	1	0	0		2.6						4.22		150	319	11.9	237.3	16.6		0.0284429	0.571429	0.0284429	0.571429	0.0279524	0.4	0.0279524	0.4	0.0288195	0.333333	0.0288195	0.333333	1.3006e-92	0.666667	1.3006e-92	0.666667	0.000480597	0.6875	0.000480597	0.6875	0.000480597
0.0655738	1										1	0	0			1136	320	34	158	43	4.7			129	1.5		2.9
0.0666667	0	1	1	0	1	0	1	0	0	0	0	0	0	0.9	3.17	212					0.67			88	14.4		27.4	-1	0.2	0.4286	0.2	0.4286	0.1079	0.3	0.1079	0.3	0.0247	0.25	0.0247	0.25	0.0755	0.6667	0.0755	0.6667	0.0039	0.75	0.0039	0.75	0.0039
0.0666667	0	0	0	0	0	0	0	0	0	0	0	0	0	2.15	8.06	35000	183	33	71	36	2.55			68			20	-1	0.03	0.5714	0.03	0.5714	0.028	0.4	0.028	0.4	0.0288	0.3333	0.0288	0.3333	0.023	0.6	0.042	0.6	0.0039	0.5625	0.0029	0.5625	0.0012
0.0666667	0	1	1	0	0	0	0	0	0	1	1	0	1		8.5						1.43								0.00978182	0.142857	0.0075923	0.285714	0.010882	0.1	0.00750912	0.2	0.0140332	0.0833333	0.011055	0.166667	0.018817	0.533333	0.0083096	0.533333	0.00087536	0.625	0.000480597	0.625	0.00087536
0.0666667	0	0	1	0	1	1	0	0	0	0	1	0	0		8						0.48		171	236	6.3		9.8		0.0284429	0.428571	0.0284429	0.428571	0.0279524	0.3	0.0279524	0.3	0.0288195	0.25	0.0288195	0.25	0.0083096	0.8	0.0083096	0.666667	0.000480597	0.75	0.000480597	0.625	0.000480597
0.0666667	0	0	0	0	0	0	0	1	0	1	1	0	0								1.33		208	175	10.3	33.5	14.6		0.0075923	0.285714	0.0075923	0.285714	0.00750912	0.2	0.00750912	0.2	0.011055	0.166667	0.011055	0.166667	0.0344563	0.533333	0.0344563	0.533333	0.00215029	0.5625	0.00215029	0.5625	0.00087536
0.0666667	1	0	0	0	1	0	0	0	0	0	1	0	0								2.76			299			314		0.0284429	0.285714	0.0075923	0.571429	0.0279524	0.2	0.00750912	0.4	0.0288195	0.166667	0.011055	0.333333	1.3006e-92	0.733333	0.0083096	0.8	0.00087536	0.75	0.000480597	0.75	0.00087536
0.0666667	0	0	0	0	1	0	0	0	0	1	0	0	0											40			1.8	-15.3	0.356222	0.285714	0.421245	0.142857	0.594596	0.2	0.657056	0.1	0.701837	0.166667	0.755365	0.0833333	0.645656	0.466667	0.443246	0.4	0.391741	0.5	0.323004	0.4375	0.391741
0.0666667	1	0	1	0	1	0	0	0	0	0	1	0	0		8.6						1.39		180	122			2.8		0.263707	0.285714	0.00878154	0.428571	0.409181	0.2	0.0083096	0.3	0.611904	0.166667	0.0128082	0.25	1.86948e-90	0.466667	0.0125179	0.466667	0.26115	0.375	0.00290041	0.5	0.0232029
0.1	0	0	1	0	1	0	0	0	0	0	0	0	1	0.96							0.94			123	3.5		5.1		0.03	0.5714	0.01	0.7143	0.028	0.4	0.0075	0.5	0.0288	0.3333	0.0111	0.4167	0.0125	0.7333	0.0083	0.7333	0.0173	0.6875	0.0009	0.8125	0.0009
0.1	1	0	1	0	1	0	0	0	0	1	1	0	0								0.94		132	276	11.7	7.4	13.7	-11.8	0.0075923	0.285714	0.0075923	0.571429	0.00750912	0.2	0.00750912	0.4	0.011055	0.166667	0.011055	0.333333	0.0083096	0.8	0.062269	0.533333	0.00087536	0.75	0.0310685	0.5	0.000480597
0.1	0	0	1	0	1	1	0	0	0	1	1	0	0	0.67	5.1	6182	150	44	75	53	8.68	3.54	159	43		157.1	6.1	12.2	0.210685	0.285714	0.210685	0.285714	0.159628	0.2	0.159628	0.2	0.0520724	0.166667	0.0520724	0.166667	0.0611687	0.133333	0.0611687	0.133333	0.391741	0.125	0.391741	0.125	0.162465
0.1	0	0	0	0	0	0	0	0	0	0	1	0	0		11.2						6.69		167	132	7.2	46	11.8		0.0241978	0.285714	0.0268049	0.285714	0.0162561	0.2	0.01741	0.2	0.0208705	0.166667	0.0232401	0.166667	0.0512223	0.333333	0.0281953	0.266667	0.00290041	0.4375	0.00087536	0.4375	0.00290041
0.133333	0	0	0	0	0	0	0	0	0	1	1	0	0	0.46							3.74	0.28	194	199			14.1		0.0075923	0.285714	0.0075923	0.285714	0.00750912	0.2	0.00750912	0.2	0.011055	0.166667	0.011055	0.166667	0.018817	0.733333	0.018817	0.733333	0.00087536	0.5625	0.00087536	0.5625	0.00087536
0.133333	1	1	1	0	0	0	0	0	0	1	1	0	1		8.7	5541	457	49	45	73	4.47		156	146	4.2		10.5	-6.2	0.0617803	0.285714	0.241328	0.142857	0.0616413	0.2	0.241664	0.1	0.0425905	0.166667	0.129294	0.0833333	0.0125179	0.266667	0.0125179	0.266667	0.00391117	0.25	0.00215029	0.375	0.00391117
0.166667	0	1	1	0	1	0	0	0	0	1	1	0	1		9.1						0.23							-10.1	0.0492562	0.142857	0.0284429	0.428571	0.0529407	0.1	0.0279524	0.3	0.0491564	0.0833333	0.0288195	0.25	0.0344563	0.466667	0.0420474	0.466667	0.00956532	0.4375	0.0128688	0.5625	0.00527231
0.233333	1	0	0	0	1	1	0	1	0	0	1	0	0	0.56	7.24	8815	329	26	62	52	9.83			33			13.4	-4.5
0.233333	0										0	0	0
0.233333	0	0	1	0	1	0	0	0	0	0	1	0	0		1.6						2.34	0.62	168	102	7.4		9		0.0075923	0.285714	0.0284983	0.285714	0.00750912	0.2	0.0181405	0.2	0.011055	0.166667	0.0248857	0.166667	0.0755084	0.466667	0.0344563	0.266667	0.00215029	0.375	0.00956532	0.4375	0.00087536
0.3	0	0	0	0	0	0	0	0	0	1	1	0	0								5.07								0.0075923	0.285714	0.0075923	0.285714	0.00750912	0.2	0.00750912	0.2	0.011055	0.166667	0.011055	0.166667	0.0512223	0.533333	0.0512223	0.533333	0.000480597	0.6875	0.000480597	0.6875	0.000480597
0.333333	1	0	0	0	0	1	0	0	0	0	0	0	1	0.42		308	275	25	63	36	15.6			38			8.4		0.15	0.2857	0.45	0.2857	0.0864	0.2	0.326	0.2	0.0999	0.1667	0.2801	0.1667	0.0512	0.6667	0.11	0.6	0.0129	0.625	0.0415	0.5	0.0053
0.333333	0	1	1	0	1	0	0	0	0	0	1	0	0	0.48	13	228	450	50	151	78	20.65			148	11.8		20.6	-1	0.03	0.5714	0.01	0.7143	0.028	0.4	0.0075	0.5	0.0288	0.3333	0.0111	0.4167	0.0125	66.67	0.0512	0.7333	0.0173	0.625	0.0096	0.625	0.0039
0.333333	1	0	0	0	0	0	0	0	0	0	1	0	0	0.4	7.64						4.03		155	288	14.2	457.9	19.7		0.0075923	0.285714	0.0075923	0.285714	0.00750912	0.2	0.00750912	0.2	0.011055	0.166667	0.011055	0.166667	0.0912887	0.4	0.0083096	0.466667	0.000480597	0.5	0.000480597	0.4375	0.000480597
0.366667	0	0	1	0	0	0	0	0	0	0	1	0	0	0.49	2.53	1077	339	51	43	72	8.15			12			2.6	5.1	0.05	0.5714	0.05	0.7143	0.03	0.4	0.03	0.5	0.0095	0.3333	0.0095	0.4167	0.0054	0.8	0.0102	0.6	0.0005	0.75	0.0071	0.5625	0.0005
0.4	1	0	0	0	0	0	0	0	0	0	1	0	0	0.32	0.32						1.2	0.77		283			10.3	2	0.07	0.4286	0.07	0.4286	0.1412	0.3	0.1412	0.3	0.3384	0.25	0.3384	0.25	0.1319	0.4	0.1319	0.4	0.0129	0.375	0.0129	0.375	0.0129
0.4	0	0	0	0	1	1	0	0	0	0	0	0	0	0.62		2989	464	31	53	70	26.86			72	8.2		15.7	-2.9	0.16	0.2857	0.03	0.4286	0.0917	0.2	0.0306	0.3	0.124	0.1667	0.0306	0.25	0.0282	0.8	0.0282	0.7333	0.0096	0.5	0.0415	0.5	0.0096
0.433333	1	1	1	0	0	1	0	0	0	1	0	1	0								3		138	281	25.7	99.7	37.5		0.0075923	0.285714	0.0075923	0.285714	0.00750912	0.2	0.00750912	0.2	0.011055	0.166667	0.011055	0.166667	0.0083096	0.666667	0.0083096	0.666667	0.000480597	0.6875	0.000480597	0.6875	0.000480597
0.433333	0	0	0	0	0	0	0	0	0	1	1	0	0	0.28	12.5						5.21			62			11.2		0.443246	0.285714	0.0075923	0.571429	0.278563	0.2	0.00750912	0.4	0.501268	0.166667	0.011055	0.333333	0.57322	0.0666667	0.00540506	0.6	0.945833	0.0625	0.00391117	0.5625	0.840238
0.466667	0	0	0	0	1	0	0	0	0	0	1	0	0	0.42							27.43			294	14.1		20.1		0.01	0.5714	0.01	0.5714	0.0075	0.4	0.0075	0.5	0.0111	0.3333	0.0111	0.3333	0.0083	0.5333	0.0188	0.5333	0.0005	0.4375	0.0005	0.375	0.0005
0.5	0	0	0	0	0	0	0	0	0	0	1	0	0	12.3	0.66	2864	421	51	34	43	6.57	45.57	120	293			11.6		0.0157042	0.285714	0.0075923	0.285714	0.0121783	0.2	0.00750912	0.2	0.0145359	0.166667	0.011055	0.166667	4.50338e-92	0.266667	2.97674e-92	0.266667	0.00118125	0.3125	0.000480597	0.3125	0.00118125
0.566667	1	1	1	0	1	0	0	0	0	0	0	1	0	0.28	0.21	310	435	40	46	63	33.75			70	1.3		3.3	-1	0.09	0.4286	0.08	0.4286	0.0623	0.4	0.0546	0.4	0.0582	0.25	0.0478	0.25	0.0282	0.7333	0.1575	0.6	0.0022	0.5625	0.0053	0.4375	0.0022
0.6	0	0	0	0	0	0	0	0	0	0	1	0	0	0.22							15.42			543			20.5	-3.9	0.01	0.4286	0.01	0.4286	0.0075	0.3	0.0075	0.3	0.0111	0.25	0.0111	0.25	0.0083	0.6	0.0083	0.6	0.0005	0.5625	0.0005	0.625	0.0005
0.6	0	1	0	0	0	0	0	0	0	0	1	0	0	0.42		3259					25.13			262	4.5		7.7	-5.1	0.11	0.2857	0.11	0.2857	0.1229	0.5	0.1229	0.5	0.0722	0.3333	0.0722	0.3333	0.3922	0.0667	0.3922	0.0667	0.0311	0.0625	0.0311	0.0625	0.0129
0.633333	0	0	1	0	0	0	0	0	0	1	1	0	0	0.42							0.43	0.25	122	243	4	65.4	9.1		0.062269	0.285714	0.062269	0.285714	0.0472072	0.2	0.0472072	0.2	0.039859	0.166667	0.039859	0.166667	0.018817	0.533333	0.018817	0.533333	0.000480597	0.4375	0.000480597	0.4375	0.000480597
0.7	1	0	0	0	0	1	0	1	0	0	1	0	0	0.49	4.12		379	45	56	44	15.4			246			5.3	-2.5	0.01	0.5714	0.01	0.5714	0.0075	0.4	0.0075	0.4	0.0111	0.3333	0.0111	0.3333	0.0083	0.8	0.0083	0.6	0.0005	0.75	0.0022	0.5	0.0005
0.733333	1	0	1	0	1	1	0	0	0	1	1	0	0		5.4						9.17		120	136	5.9		9.3		0.0412616	0.142857	0.0075923	0.571429	0.0435345	0.1	0.00750912	0.4	0.0413408	0.0833333	0.011055	0.333333	0.0083096	0.533333	0.0230448	0.6	0.000480597	0.5625	0.00118125	0.6875	0.000480597
0.766667	0	0	1	0	1	0	1	0	1	0	1	0	0	0.67	1.84	3938	418	41	36	63	12.97			194			10.3	-1.9	0.06	0.4286	0.03	0.5714	0.0165	0.3	0.0102	0.4	0.0085	0.25	0.0065	0.3333					0.0022	0.25	0.0022	0.375	0.0009
0.8	0	1	1	0	1	0	0	0	0	0	0	0	0	0.33	5	3927	573	51	50	76	34.7			27	0.2		1.9	-6.5	0.15	0.5714	0.05	0.5714	0.134	0.4	0.0391	0.40005	0.0034	0.3333	0.0013	0.3333	0.0102	0.8667	0.0083	0.7333	0.0006	0.8125	0.0173	0.6875	0.0005
0.8	0	0	1	0	1	0	0	0	0	1	1	0	0								3.3		108	174	4.7		7.8	-7.8	0.0075923	0.428571	0.0075923	0.428571	0.00750912	0.3	0.00750912	0.3	0.011055	0.25	0.011055	0.25	0.0083096	0.8	0.018817	0.6	0.00087536	0.75	0.00215029	0.5625	0.00087536
0.8	0	0	0	0	0	0	0	0	0	0	1	0	0								7.35			253			152		0.0138708	0.285714	0.0138708	0.285714	0.0112114	0.2	0.0112114	0.2	0.013468	0.166667	0.013468	0.166667	0.018817	0.6	0.018817	0.6	0.000480597	0.5625	0.000480597	0.5625	0.000480597
0.833333	0	1		0	1	1	1	0	0	0	0	0	1	0.86	8.31		143		74	23	7.92			77	5.2		9.9	-18.7	0.14	0.4286	0.18	0.2857	0.0839	0.3	0.0976	0.2	0.1019	0.25	0.1435	0.1667	0.0755	0.7333	0.023	0.7333	0.0039	0.6875	0.0029	0.6875	0.0039
0.933333	1	0	0	0	1	0	0	0	1	0	1	0	0	0.25	4.83						4			24			4.5	-1	0.03	0.4286	0.01	0.5714	0.028	0.3	0.0075	0.4	0.0288	0.25	0.0111	0.3333	0.0125	0.6	0.0229	0.6	0.0012	0.6875			0.0012
0.933333	0	0	1	0	0	0	0	0	0	0	1	0	0	0.58	6.19						7.02			462			9.9	-4	0.13	0.2857	0.03	0.4286	0.1955	0.2	0.028	0.3	0.3817	0.1667	0.0288	0.25	0.3929	0.3333	0.0512	0.5333	0.0311	0.375	0.0012	0.5	0.0129
0.966667	1	1	1	0	1	0	0	0	0	0	1	0	0	0.38		8160	390	41	73	49	13.94	136.4	134	134	23.3		24.2	-0.1	0.0075923	0.285714	0.0205325	0.285714	0.00750912	0.2	0.0145645	0.2	0.011055	0.166667	0.0178731	0.166667	0.109486	0.133333	0.0908748	0.133333	0.0172932	0.0625	0.0172932	0.0625	0.00391117
1	0	0	1	0	1	0	0	0	0	1	1	0	0	64.5		12390	423	41	33	71	16.27	3.6	108	181	5.7		8.8		0.0302953	0.285714	0.00423976	0.285714	0.0189012	0.2	0.00203545	0.2	0.0267248	0.166667	0.00425025	0.166667	0.0281953	0.466667	1.01131e-91	0.2	0.00215029	0.5	0.00527231	0.25	0.00215029
1.03333	1	1	0	0	0	0	0	0	0	0	0	0	0	0.68		1332	202	41	62	44	15.25			105			1.8	-1
1.04918	1										1	0	0				470		46	12	16.23			102	8.4		11.6		0.05	0.2857	0.01	0.5714	0.0117	0.2	0.0016	0.4	0.006	0.1667	0.0013	0.3333	0.0154	0.7333	0.0343	0.6667	0.0096	0.6875	0.0173	0.625	0.0096
1.06667	1	0	0	0	1	0	0	0	0	0	1	0	0	0.3							16.59	1.17		215	8		12	2.2	0.04	0.2857	0.01	0.4286	0.0342	0.2	0.0075	0.3	0.0308	0.1667	0.0111	0.25	0.1313	0.3333	0.028	0.533	0.0012	0.3125	0.0005	0.375	0.0012
1.06667	0	0	1	0	0	0	1	1	0	1	1	0	0	30.8	4.43	4.78		70		106	17.1	16.37	62	194	74		5.7		0.0115096	0.285714	0.0115096	0.285714	0.00990168	0.2	0.00990168	0.2	0.0122876	0.166667	0.0122876	0.166667	0.0280586	0.266667	0.0280586	0.266667	0.00391117	0.3125	0.00391117	0.3125	0.00215029
1.08197	1	0	0	0	0	0	0	0	0	1	1	0	0								7.04			562			19.6		0.0075923	1	0.0075923	1	0.00750912	1	0.00750912	1	0.011055	1	0.011055	1	0.0082644	0.733333	0.0082644	0.733333	0.000480597	0.625	0.000480597	0.625	0.000480597
1.14754	1	0	1	0	0	0	1	0	0	0	0	0	0								17.59			78			3.6		0.0284429	0.571429	0.0284429	0.571429	0.0279524	0.6	0.0279524	0.6	0.0288195	0.583333	0.0288195	0.583333	0.0619486	0.6	0.0619486	0.6	0.00956532	0.4375	0.00956532	0.4375	0.00710377
1.16667	0	1	1	0	1	0	1	0	0	0	1	0	0	1.43	0.69		287	55	49	50	30.38			36			14.8	-1	0.49	0.4286	0.38	0.4286	0.3208	0.3	0.2552	0.3	0.094	0.25	0.0546	0.25	0.1095	0.5333			0.2611	0.4375	0.0552	0.4375	0.0173
1.16667	0	0	0	0	0	1	0	0	0	0	1	0	0	0.21	10.23	638	260	31	47	61	14.09			276	2.3		6.8		0.03	0.4286	0.01	0.4286	0.028	0.3	0.0112	0.3	0.0288	0.25	0.017	0.25	0.0282	0.4667	0.028	0.7333	0.0022	0.4375	0.0005	0.4	0.0005
1.2	1	0	0	0	0	1	0	0	0	0	1	0	0				383	42	40	90	21.85			6			21.2		0.01	0.4286	0.01	0.4286	0.0027	0.3	0.0027	0.3	0.0316	0.25	0.0316	0.25	0.0125	0.6667	0.0343	0.5333	0.0009	0.5	0.0129	0.5	0.0009
1.23333	1	1	0	0	0	0	0	0	0	0	1	0	0	0.23	0.15	8579	583	112	31	100	26.68	2.41	71	745	14.7	66.1	22.9		0.014161	0.285714	0.014161	0.285714	0.0113671	0.2	0.0113671	0.2	0.0136289	0.166667	0.0136289	0.166667	0.0342903	0.2	0.0342903	0.2	0.00118125	0.25	0.00118125	0.25	3.34144e-134
1.3	0	0	0	0	0	1	0	0	0	1	1	0	0	0.32	4.49		283	48	64	39	30.84			26			11.4	-1
1.33333	1	0	0	0	0	1	0	0	0	0	1	0	0	0.19	2.4	2949	219	53	40	73	4.33	0.32	65	82			6.6		0.014161	0.285714	0.014161	0.285714	0.0113671	0.2	0.0113671	0.2	0.0136289	0.166667	0.0136289	0.166667	0.0187249	0.266667	0.0187249	0.266667	0.00159386	0.25	0.00159386	0.25	0.00159386
1.4	0	0	0	0	0	0		0	0	1	1	0	0	0.27			318		42		0.39	0.24	106	498	4.2	18.1	12.6		0.0075923	0.285714	0.0075923	0.285714	0.00750912	0.2	0.00750912	0.2	0.011055	0.166667	0.011055	0.166667	0.0619776	0.466667	0.0619776	0.466667	0.00118125	0.375	0.00290041	0.375	0.000480597
1.43333	0	0	0	0	0	1	0	0	0	0	0	0	0	0.58	1.66						29.32	43.58		311			15.9	9.3	0.97	0	0.97	0	0.9841	0	0.9841	0	0.9709	0	0.9709	0					0.9988	0.1875	0.9988	0.1875
1.43333	1	0	1	0	0	0	0	0	0	0	1	0	0	0.95	1.35	1177	403	83	43	55	30.03			144			7.3		0.24	0.4286	0.24	0.4286	0.3847	0.3	0.3847	0.3	0.5759	0.25	0.7987	0.25	0.1566	0.4667	0.2982	0.6667	0.0311	0.4375	0.0962	0.5625	0.0311
1.43333	0	0	0	0	0	0	0	0	0	1	1	0	0								11.47	27.87	92	260	7.7	220.9	17.7		0.0075923	0.285714	0.0075923	0.285714	0.00750912	0.2	0.00750912	0.2	0.011055	0.166667	0.011055	0.166667	0.0187249	0.6	0.00826849	0.466667	0.00290041	0.4375	0.000480597	0.5	0.00159386
1.43333	0	0	0	0	0	0	0	0	0	1	1	0	0								7.35		94	520	5	34.5	13.1		0.0075923	0.285714	0.0075923	0.428571	0.00750912	0.2	0.00750912	0.3	0.011055	0.166667	0.011055	0.25	0.0187249	0.533333	0.00826849	0.733333	0.000480597	0.5	0.000480597	0.625	0.000480597
1.53333	0	1	1	0	1	1	1	0	0	0	1	0	0	0.26	6.12		253	53	48	48	9.97			86	7.7		10.5	-1.7	0.01	0.7143	0.01	0.7143	0.0027	0.6	0.0027	0.6	0.0046	0.4167	0.0046	0.4167	0.0151	0.7333	0.0054	0.8667	0.0096	0.625	0.0009	0.875	0.0016
1.53333	1	0	1	0	0	0	0	0	0	0	0	0	0	0.26			58				21.2			169			7.6
1.56667	1	1	1	0	1	0	0	0	0	0	1	0	0	0.21	0.28	2247	538	68	39	56	23.75			524	35.8		50.1	0.9	0.03	0.4286			0.028	0.3			0.0288	0.25
1.63934	1										1	0	0								3.31			192	4.9		11.1		0.0747441	0.571429	0.0747441	0.571429	0.141244	0.4	0.141244	0.4	0.338394	0.333333	0.338394	0.333333	0.219086	0.466667	0.219086	0.666667	0.26115	0.25	0.0310685	0.5	0.26115
1.7	1	1	1	0	1	0	0	0	0	1	1	0	0	0.31							11.75			348			31.6		0.676403	0	0.00568061	0.285714	0.756529	0	0.00685907	0.2	0.843055	0	0.0134022	0.166667	0.258075	0	0.0418465	0.333333	0.125648	0.0625	0.0128688	0.3125	0.0310685
1.76667	0	0	0	0	0	0	0	0	0	0	1	0	0	0.25		959					2.34			332	9.5		14.9	-1	0.01	0.4286	0.01	0.4286	0.0075	0.3	0.0075	0.3	0.0111	0.25	0.0111	0.25	0.0187	0.6667	0.0187	0.6667	0	0.4375	0	0.4375	0
1.83333	0	0	1	0	0	0	0	0	0	0	1	0	0	0.9		66	281	60	45	78	6.6			313			14.9
1.9	0	0	0	0	0	1	0	0	0	0	1	0	0	0.23	0.44	686	217	47	37	69	13.23	8.04		345			22.1	-2.8	0.01	0.5714	0.01	0.4286	0.0075	0.4	0.0086	0.3	0.0111	0.3333	0.011	0.25	0.0187	0.6667	0.0125	0.6			0.0005	0.625
1.9	0	0	1	0	0	0	1	1	0	0	1	0	0	0.22	1.38						1.27		107	211			8.1		0.0075923	0.285714	0.0075923	0.285714	0.00750912	0.2	0.00750912	0.2	0.011055	0.166667	0.011055	0.166667	0.0229325	0.466667	0.0187249	0.466667	0.000480597	0.4375	0.000480597	0.4375	0.000480597
2	1	0	0	0	1	1	0	0	0	0	1	0	0	0.4	0.17	632	272	57	33	88	1.52			390	1.6		10.4		0.01	0.2857	0.01	0.2857	0.0075	0.2	0.0075	0.2	0.0111	0.1667	0.0111	0.1667	0.0082	0.4	0.0082	0.4	0.055	0.3125	0.055	0.3125	0.0005
2.03333	0	1	0	0	1	0	0	1	0	0	1	0	0	0.38	0.27	8790	186		54	67	2.19	1.54	100	80	1.7		11.3		0.0409732	0.285714	0.0409732	0.285714	0.0356467	0.2	0.0356467	0.2	0.0314508	0.166667	0.0314508	0.166667	0.0229325	0.266667	0.0229325	0.266667	0.00159386	0.3125	0.00159386	0.3125
2.1	0	1	0	0	0	0	0	0	0	0	1	0	0	0.34							25.55	39.58	97	317	11.6		21.2		0.0075923	0.285714	0.0075923	0.285714	0.00750912	0.2	0.00750912	0.2	0.011055	0.166667	0.011055	0.166667	0.0748133	0.466667	0.0748133	0.466667	0.00118125	0.375	0.00118125	0.375	0.00118125
2.23333	0	0	0	0	0	1	0	0	0	0	1	0	0								17.84			164			28.4		0.01	0.4286	0.01	0.4286	0.0075	0.3	0.0075	0.3	0.0111	0.25	0.0111	0.25	0.0279	0.6	0.0279	0.6	0.0009	0.5625	0.0009	0.5625	0.0009
2.33333	0	0	0	0	1	1	0	0	0	0	1	0	0	0.34	0.17	8994	324	57	51	64	13.28			91			4.1	-1	0.03	0.5714	0.01	0.5714	0.028	0.5	0.0075	0.5	0.0122	0.3333	0.0046	0.3333			0.0122	0.5333					0.0005
2.4	1	0	0	0	0	0	0	1	0	0	1	0	0	0.2			451	66	41	85	4.6			200	1.8		8.2		0	0.2857	0	0.2857	0.003	0.2	0.003	0.2	0.0065	0.1667	0.0065	0.1667	0.0616	0.7333	0.0616	0.7333	0.0005	0.6875	0.0005	0.6875	0.0005
2.5	0	0	0	0	0	0	0	1	0	0	1	0	0	0.21	15.88		432		50	74	13.6	8.8		350			7.1		0.01	0.7143	0.01	0.7143	0.0391	0.5	0.0391	0.5	0.0111	0.4167	0.0111	0.4167	0.034	0.6667	0.034	0.6667	0.0005	0.5625	0.0005	0.625	0.0005
2.91803	0										1	0	0								2.31			214	5.5		11.1		0.04	0.4286	0.03	0.5714	0.0085	0.3	0.0021	0.4	0.0042	0.25	0.0034	0.3333	0.0083	0.8			0.0022	0.6875	0.0005	0.8125	0.0012
3.1	1	1	0	0	1	1	0	0	0	0	1	0	0	0.21							18.57	12.28		436	9.2		24.3	-1.9	0.01	0.5714	0.01	0.5714	0.0075	0.4	0.0075	0.4	0.0111	0.3333	0.0111	0.3333	0.0279	0.5333	0.0278	0.7333	0.0005	0.5625	0.0005	0.6875	0.0005
3.4	0	0	0	0	0	0	0	0	0	0	1	0	0	0.23		1683	397	88	34	110	2.03			440	3.1		24.2	-1.5	0.01	0.5714	0.01	0.5714	0.0075	0.4	0.0075	0.4	0.0111	0.3333	0.0111	0.3333	0.0082	0.6667	0.0278	0.7333	0	0.5625	0	0.625	0
3.43333	1	0	1	0	0	0	0	0	0	0	1	1	0	1.4		5769	227	58	49	57	3.41			111			5.1	-0.6	0.01	0.4286	0.02	0	0.0075	0.3	0.0067	0	0.0111	0.25	0.0085	0	0.0185	0.5333	0.0332	0.2					0.0009
3.5	0	0	1	0	0	0	0	0	0	0	1	0	0	0.32	0.71	688	152		39	69	0.16		112	494			12.5		0.0075923	0.285714	0.0112731	0.285714	0.00750912	0.2	0.00976585	0.2	0.011055	0.166667	0.0121836	0.166667	0.00818689	0.266667	0.00818689	0.533333	0.000480597	0.3125	0.00118125	0.4375	0.000480597
3.76667	0	0	0	0	0	0	0	0	0	0	1	0	0	0.22		1384	518	67		84	14.58			269			15.5	-4.1	0.01	0.5714	0.01	0.5714	0.0075	0.4	0.0075	0.4	0.0111	0.3333	0.0111	0.3333	0.0278	0.7333	0.0414	0.8667	0	0.5625	0.0012	0.8125	0
3.8	0	0	0	0	0	0	0	0	0	1	1	0	0	0.34							2.66		104	319	3.6		6.9		0.0075923	0.428571	0.0075923	0.428571	0.00750912	0.3	0.00750912	0.3	0.011055	0.25	0.011055	0.25	0.0613988	0.666667	0.0613988	0.666667	0.000480597	0.4375	0.000480597	0.4375	0.000480597
3.83333	1	0	1	0	1	0	0	0	0	0	1	0	0	0.19	0.6	1.416	246	56	44	60	5.52	2.43	103	171			7.1	-2	0.0284429	0.285714	0.0635065	0.285714	0.0279524	0.2	0.0478387	0.2	0.0288195	0.166667	0.0404553	0.166667	0.0613988	0.2	0.0339607	0.0666667	0.00527231	0.1875	0.00087536	0.0625	0.00118125
3.86667	0	0	0	0	0	1	0	0	0	0	1	0	0	0.19	0.97	2182	303	42	45	76	8.55			170			6.4	-3.2	0.01	0.4286	0.01	0.4286	0.0075	0.3	0.0075	0.3	0.0111	0.25	0.0111	0.25	0.0082	0.5333	0.1081	0.5333	0.0012	0.5	0.0009	0.4375	0.0012
4.03333	1	0	1	0	0	0	0	1	0	0	1	1	0	0.15	11.84	16671	712	47	49	55	20.68			118			8.5	-1
4.06667	0	0	0	0	0	0	0	0	0	1	1	0	0								9.05								0.0075923	0.285714	0.0075923	0.285714	0.00750912	0.2	0.00750912	0.2	0.011055	0.166667	0.011055	0.166667	0.0744679	0.533333	0.0277872	0.666667	0.00290041	0.4375	0.000480597	0.75	0.00290041
4.13333	0	0	0	0	0	0	0	0	0	0	1	0	0	0.29							12.47			650			26.9		0.01	0.4286	0.01	0.4286	0.0178	0.3	0.0112	0.3	0.0193	0.3333	0.0143	0.3333	0.0277	0.5333	0.0277	0.5333	0.0005	0.375	0.0005	0.4375	0.0005
4.2	1	1	1		1	1	0	0	0	0	1	0	0	0.43		752	337	47	43	55	14.96			179			13.2	5.4
4.36667	1	0	1	0	1	0	1	0	0	0	1	1	0	0.26			200	34	48	82	6.94	2.92		245			7.5	1.8	0.01	0.4286	0.01	0.4286	0.0075	0.3	0.0075	0.3	0.0111	0.25	0.0111	0.25	0.0277	0.8	0.0277	0.7333	0.0005	0.8125	0	0.625	0.0005
4.36667	0	0	0	0	0	0	0	0	0	0	1	0	0	0.26							7.1		108	39.5			21		0.0075923	0.285714	0.0075923	0.285714	0.00750912	0.2	0.00750912	0.2	0.011055	0.166667	0.011055	0.166667	0.0611113	0.333333	0.0611113	0.333333	0.000480597	0.3125	0.000480597	0.3125	0.000480597
4.63333	0	0	0	0	0	0	0	0	0	0	1	0	0	0.72	0.1	13245	518	82	41	64	34.31			75	23.2		28.1	-11.1	0.21	0.1429	0.14	0	0.2417	0.1	0.1489	0	0.2026	0.0833	0.0958	0	0.5414	0.2667	0.1297	0.2667	0.0552	0.1875	0.0415	0.25	0.0311
5	0	0	0	1	0	0	0	0	0	1	1	0	0	0.34		1279	298	95	28	57	0.15	0.12	120	221	3.2		9.8		0.0075923	0.285714	0.0075923	0.285714	0.00750912	0.2	0.00750912	0.2	0.011055	0.166667	0.011055	0.166667	0.0611113	0.466667	0.0611113	0.466667	0.000480597	0.375	0.000480597	0.375	0.000480597
5.06667	1	0	0	0	0	1	0	0	0	0	1	0	0	0.25	13.92	460	552		47	81	29.12			49			42.3	-6.3	0.01	0.8571	0.01	0.8571	0.0075	0.7	0.0075	0.7	0.0111	0.75	0.0111	0.75	0.0275	0.8	0.0275	0.8	0.0022	0.75	0.0022	0.75	0.0022
5.2459	0	0	0	0	0	0	0	0	0	1	1	0	0				635		46	90	15.21			401	20.2		26.8		0.0075923	0.714286	0.0075923	0.714286	0.00750912	0.8	0.00750912	0.8	0.011055	0.833333	0.011055	0.833333	0.0274916	0.6	0.0274916	0.6	0.000480597	0.4375	0.000480597	0.4375	0.000480597
5.53333	0	0	0	0	0	1	0	0	0	1	1	0	0	0.25							8.04			224			14.4		0.01	0.4286	0.01	0.5714	0.0075	0.3	0.0075	0.4	0.0111	0.25	0.0111	0.3333	0.0275	0.7333	0.0275	0.9333
5.76667	0	0	1	0	1	1	0	0	0	1	0	0	0	0.33	1.01		261	47	58	87	8.79	7	103	21	10.4		17.8	7.1	0.0453472	0.285714	0.833851	0.142857	0.0391206	0.2	0.808483	0.1	0.142002	0.166667	0.978498	0.0833333	0.902999	0.133333	0.919679	0	0.681354	0.0625	0.840238	0.0625
5.8	0	0	0	0	0	0	1	0	0	0	1	0	0	0.47	0.24	1221	829	72	35	100	36.62	195.9		25			31.1		0.01	0.4286	0.01	0.4286	0.0075	0.3	0.0075	0.3	0.0111	0.25	0.0111	0.25	0.1286	0.6			0.0053	0.5			0.0129
6.1	0	0	0		0	0	0	0	1	0	1	0	0	0.38	0.24	6204	501	45	54	76	28.54	0.93		53	0.2		3.5	1.8	0.01	0.4286	0.02	0.2857	0.0075	0.3	0.013	0.2	0.0111	0.25	0.0156	0.1667	0.1824	0.0667	0.0129	0.2					0.0071
6.1	0	0	0	0	0	1	0	1	0	1	1	0	0	0.21	1.62	19994	542	46	44	60	40.33	1.56	89	81	13.4		16.4	3.6	0.00386707	0	0.00261989	0.285714	0.0131392	0	0.00790009	0.2	0.00246679	0	0.00163722	0.166667	0.634368	0	0.0497838	0	0.00527231	0.0625	0.00710377	0.0625	0.00527231
6.2	1	0	0	0	0	1	0	0	0	0	1	0	0								10.88			391	7.3		10	-3	0.01	0.2857	0.01	0.2857	0.0075	0.2	0.0075	0.2	0.0111	0.1667	0.0111	0.1667	0.0605	0.5333	0.0605	0.6667	0.0012	0.375	0.0005	0.6875	0.0012
6.46667	1	0	0	0	0	1	0	0	0	0	1	0	0		0.74	563	636	42	53	58	45.04			103			9.3		0.04	0.2857	0.06	0.2857	0.0135	0.2	0.017	0.2	0.0072	0.1667	0.0088	0.4167	0.2488	0.3333	0.0149	0.4	0.0232	0.25	0.0016	0.5
6.5	1	0	0	0	1	0	1	0	0	1	1	0	0	0.52	3.1	31413	40	58	157	10	18	2	100	12	8.1		140	-7.4	0.0462209	0.285714	0.119455	0.142857	0.0386385	0.2	0.108158	0.1	0.0331617	0.166667	0.073537	0.0833333	0.0602563	0.333333	0.0495478	0.133333	0.000480597	0.375	0.0128688	0.0625	0.000480597
6.8	0	0	1	0	1	1	0	0	0	1	1	1	0	1.45	0.28	807	314	26	49	37	20.21			42	14.7		17.8	-1	0.03	0.5714	0.03	0.5714	0.028	0.4	0.028	0.4	0.0288	0.4167	0.0288	0.4167	0.0083	0.9333	0.0183	0.6	0.0016	0.875	0.0232	0.5625	0.0016
7.27869	1										1	0	0			1332	227	46	69	48	15.93	2.42		102	0.5		2.9		0.37	0.2857	0.09	0.4286	0.2543	0.2	0.0233	0.3	0.6266	0.1667	0.0582	0.25	0.1789	0.2	0.1789	0.3333	0.0552	0.125	0.0415	0.1875	0.0129
7.46667	0	0	0	0	0	0	0	0	0	1	1	0	0	0.27							16.1			16			17.9				0.01	1			0.0075	1			0.0111	1			0.008	0.7333			0.0022	0.625
7.63333	0	1	0	0	1	0	1	0	0	1	0	0	0								11.78			357			9.7	7
7.63333	0	0	1	0	0	0	0	0	0	1	0	0	1	0.15		1562	284	56	39	49	15.87	11.3	119	222			26.7	3.4	0.0189095	0.285714	0.131701	0.285714	0.0137849	0.2	0.199967	0.2	0.0166716	0.166667	0.387332	0.166667	0.29235	0.0666667	0.801071	0.0666667	0.00956532	0.0625	0.162465	0.0625	0.00118125
7.96667	0	1	1	0	1	0	0	0	0	0	1	0	0	0.29							3.34	0.86	98	72	27.9	120.2	32.6		0.0075923	0.285714	0.0168237	0.428571	0.00750912	0.2	0.259167	0.3	0.011055	0.166667	0.602104	0.25	0.181681	0.266667	0.181681	0.533333	0.00159386	0.3125	0.0414871	0.4375	0.00087536
8.1	0	0	0	0	0	0	0	0	0	0	1	0	0	0.33		1211	1025	68	31	80	28.06			260			17.8		0.01	0.2857	0.01	0.2857	0.0092	0.2	0.0092	0.2	0.0118	0.1667	0.0118	0.1667	0.0331	0.4	0.0331	0.4	0.0005	0.4375	0.0005	0.4375	0.0005
8.2	1	0	0	0	0	0	0	0	0	0	1	0	0	0.38							17.59	0.28		489			20.6		0.01	0.4286	0.01	0.4286	0.0075	0.3	0.0075	0.3	0.0111	0.25	0.0111	0.25	0.0271	0.5333	0.0271	0.8	0.0005	0.4375	0.0005	0.75	0.0005
8.2	0	0	0	0	0	0	0	0	0	1	1	0	0								14.26		108	409	15.5		19.8		0.0309183	0.285714	0.0309183	0.285714	0.0191616	0.2	0.0191616	0.2	0.027385	0.166667	0.027385	0.166667	0.0880243	0.533333	0.0880243	0.533333	0.00118125	0.5625	0.00118125	0.5625	0.00118125
8.2	0	0	0	0	0	1	0	1	0	0	1	0	0	0.34	6.78	28077	177	31	86	41	22.58		75	56	1.9		4.9		0.0101609	0.285714	0.00775217	0.285714	0.0297767	0.2	0.0249613	0.2	0.0126879	0.166667	0.0114605	0.166667	0.797219	0.133333	0.104331	0.0666667	0.323004	0.125	0.00391117	0.0625	0.0414871
8.36667	1	0	1	0	1	1	0	0	0	1	1	0	0	0.34	0.6	2845	434	82	67	65	13.18		114	106			6.1	12.7	0.516494	0.285714	0.250622	0.142857	0.657664	0.2	0.286979	0.1	0.602425	0.166667	0.0932934	0.0833333	0.287409	0.2	0.0589115	0.0666667	0.20751	0.25	0.26115	0.0625	0.125648
8.76667	0	0	0	0	0	0	0	0	0	0	1	0	0				471	125		98	4.38			652			12.6	-1					0.0075	0.4	0.0075	0.4	0.0111	0.3333	0.0111	0.3333	0.0271	0.8667	0.0271	0.8667	0.0005	0.75	0.0005	0.75	0.0005
9.06667	1	0	0	0	0	0	0	0	0	1	1	0	0	0.25		1208	249	86	33	96	3.35	3.4	102	109	5.2	276.4	10.9		0.0112731	0.285714	0.0112731	0.285714	0.00976585	0.2	0.00976585	0.2	0.0121836	0.166667	0.0121836	0.166667	0.213661	0.333333	0.213661	0.333333	0.00215029	0.3125	0.00215029	0.3125	0.00087536
9.36667	1	0	0	0	0	1	0	0	0	0	1	0	1	0.18	8.44	407	636	58	43	78	16.69			134	8.2		10.7		0.01	0.4286	0.01	0.4286	0.0075	0.3	0.0075	0.3	0.0111	0.25	0.0111	0.25	0.027	0.4	0.027	0.4					0.0009
9.53333	0	0	0	0	0	0	0	0	0	1	1	0	1	0.23		1347	70	89	40	78	19.87	7	108	490	10.6		14.2		0.0119973	0.285714	0.00221563	0.285714	0.0174519	0.2	0.00367306	0.2	0.00248541	0.166667	0.000791483	0.166667	0.180199	0	0.0596925	0.266667	0.000480597	0.0625	0.000480597	0.25	0.000480597
9.6	1	0	0	0	1	0	0	0	0	0	1	0	0								18.98			143			13.6	-1	0.01	0.4286	0.01	0.4286	0.0075	0.3	0.0075	0.3	0.0111	0.25	0.0111	0.25	0.027	0.7333	0.027	0.8667	0	0.625	0.0009	0.8125	0
9.83333	1	0	0	0	0	1	0	1	0	0	1	0	0	0.22	15.22	498	778	54	98	84	26.12	15.3		100	3.9		7.5		0.01	0.4286	0.01	0.4286	0.0075	0.3	0.0075	0.3	0.0111	0.25	0.0111	0.25	0.0403	0.4667	0.0403	0.4667	0.0053	0.5	0.0053	0.5
10.3	0	0	1	0	0	0	0	0	0	1	0	0	0	0.33							0.38		154	236	9.4		18.5		0.153813	0.285714	0.0772722	0.285714	0.134005	0.2	0.0560119	0.2	0.13068	0.166667	0.0633027	0.166667	0.211985	0.6	0.0268571	0.533333	0.00215029	0.8125	0.00118125	0.4375	0.00215029
10.6	0	1	0	0	0	0	0	0	0	1	1	1	0	0.29		3716	579	49	43	68	28.26	181.98	110	131	11.6	412.3	14.5	-1.9	0.0167083	0.285714	0.0125055	0.285714	0.0126921	0.2	0.010464	0.2	0.0151698	0.166667	0.0127558	0.166667	0.0720913	0	0.248617	0.0666667	0.00290041	0.0625	0.00087536	0.0625	0.00087536
10.6	0	1	0	0	0	0	0	0	0	1	1	1	0	0.29	0.18	4358	561	49	48	68	28.26	181.98	110	131	10.7	412.3	14.2	-4.2	0.014161	0.285714	0.0101609	0.285714	0.0194723	0.2	0.0156378	0.2	0.00278516	0.166667	0.00226699	0.166667	0.032831	0.133333	0.00970848	0.0666667	0.00159386	0.125	0.00087536	0.0625	0.00087536
10.6667	0	0	0	0	0	0	0	0	0	0	1	0	0	0.3							6.87	0.69		157	2.9		5.3		0.01	0.2857	0.01	0.4286	0.0075	0.2	0.0075	0.3	0.0111	0.1667	0.0111	0.25	0.0592	0.4	0.0592	0.6	0.0009	0.3125	0.0022	0.5625	0.0009
11.3667	1	1	1	0	0	1	0	0	0	1	1	1	0	1.25		17006	579	70	44	80	27.22	34.84	73	36	29.1		41.3	-1.4	0.0453472	0.285714	0.102938	0.428571	0.00750912	0.2	0.0134107	0.3	0.011055	0.166667	0.0161336	0.25	0.632975	0.133333	0.379894	0.133333	0.742691	0.0625	0.0731012	0.125	0.20751
11.3667	1	1	1	1	0	0	1	0	0	1	1	1	1	1.25	0.29	17006	579	60	44	80	27.22	34.84	73	36	29.1		32.5	4.6	0.0282666	0.142857	0.0927593	0.142857	0.0362375	0.1	0.07895	0.1	0.0284046	0.0833333	0.0577429	0.0833333	0.247685	0.0666667	0.104706	0.0666667	0.162465	0.125	0.0552005	0.0625	0.0172932
11.4667	1	1	1	0	0	1	1	0	0	1	1	0	0	1.68	n	9215	231	40	39	69	9.31	133.04	92	294			24.4	-2.3	0.0818855	0.285714	0.0580384	0.285714	0.0582662	0.2	0.046376	0.2	0.0347469	0.166667	0.037332	0.166667	0.379894	0.0666667	0.125758	0.133333	0.00956532	0.1875	0.00527231	0.1875	0.00527231
11.6	0	0	0	0	0	0	0	0	0	1	1	0	0	0.21			375		47	64	16.89		81	137	4.6		6.5		0.0167083	0.285714	0.0348578	0.285714	0.0126921	0.2	0.032003	0.2	0.0151698	0.166667	0.0298536	0.166667	0.429718	0.133333	0.0486144	0.266667	0.0414871	0.0625	0.00087536	0.25	0.0172932
11.8033	1	0	0	0	0	1	0	0	0	0	1	0	0				484		54	85	8.86			437			12.7		0.0075923	1	0.0075923	1	0.00750912	1	0.00750912	1	0.011055	1	0.011055	1	0.0325464	0.733333	0.0325464	0.733333	0.000480597	0.5625	0.000480597	0.5625	0.000480597
12.0333	0	0	0	0	1	0	0	0	0	1	1	0	0	0.26	0.26	441	576	113	36	102	5.81	0.12		463			15.5	-1.5
12.0656	0									1	1	0	0								23.45			234			6		0.049079	0.285714	0.049079	0.285714	0.0148229	0.2	0.0148229	0.2	0.00771356	0.166667	0.00771356	0.166667	0.147229	0.266667	0.147229	0.266667	0.00087536	0.375	0.00087536	0.375	0.000480597
12.1	1	0	0	0	0	1	0	1	0	0	0	0	1	0.67	10.72	237	41	15	210	18	2.44	113.47		98			31.3	-21.6	0.42	0.2857	0.42	0.2857	0.522	0.2	0.522	0.2	0.6586	0.1667	0.6586	0.1667	0.9539	0.3333	0.9539	0.3333
12.1333	0	0	0	0	0	0	0	0	0	0	1	0	0	0.34	2.05	472	578		36	89	20.15	0.86		282			22.9		0.01	0.2857	0.01	0.4286	0.0091	0.2	0.0075	0.3	0.0117	0.1667	0.0111	0.25	0.0589	0.3333	0.0266	0.8667	0.0005	0.3125	0.0005	0.75	0.0005
12.1967	1	0	0	0	0	0	0	0	0	1	0	0	0			403	224	105	64	56	1.67			96			7		0.0453472	0.714286	0.0453472	0.714286	0.079402	0.5	0.079402	0.5	0.0535927	0.416667	0.0535927	0.416667	0.00782171	0.6	0.00782171	0.6	0.00215029	0.5625	0.00215029	0.5625	0.00215029
12.2	0	0	0	1	1	1	0	0	0	1	1	0	0	0.62	21.23	1588	506	55	82	81	30.44			39			19.2	1.3
12.4262	1										0	0	0								1.5	0.6		122			8.5		0.0284429	0.428571	0.0284429	0.428571	0.0279524	0.3	0.0279524	0.3	0.0288195	0.25	0.0288195	0.25	0.0416465	0.733333	0.0101007	0.466667	0.00391117	0.5625	0.00215029	0.4375	0.000480597
12.5333	0	1	0	0	0	0	0	0	0	0	1	0	0	0.26		334	367	95	45	87	1.62	1.24		277	8.2		11.6	-3.6	0.01	0.4286	0.01	0.4286	0.0075	0.3	0.0075	0.3	0.0111	0.25	0.0111	0.25	0.0266	0.4667	0.0266	0.4667	0	0.375	0	0.375	0
12.8333	0	0	0	0	0	1	0	1	0	0	1	0	0	0.22	0.38	4.134	395	38	52	61	18.43	8.54	99	255			11.8		0.00216969	0.285714	0.00235937	0.285714	0.00697447	0.2	0.00737176	0.2	0.00152003	0.166667	0.00156567	0.166667	0.021732	0.4	0.038978	0.0666667	0.00087536	0.4375	0.00290041	0.0625	0.000480597
13.7667	0	0	0	0	0	0	0	0	0	0	1	0	0	0.38		549	405	125	34	104	1.12			924			16.1		0.01	0.4286	0.01	0.4286	0.0075	0.3	0.0075	0.3	0.0111	0.25	0.0111	0.25	0.0264	0.5333	0.0264	0.5333	0.0005	0.4375	0.0005	0.4375	0.0005
14.1	1	0	0	1	1	0	0	0	0	0	1	0	0	0.27							25			137			62		0.00996166	0.428571	0.00996166	0.428571	0.0158377	0.3	0.0158377	0.3	0.0320135	0.25	0.0320135	0.25	0.0264679	0.8	0.0264679	0.8	0.00527231	0.5625	0.00527231	0.5625	0.00527231
14.1333	0	0	0	0	0	1	0	1	0	0	1	0	0	0.3							1.4			223			14.5		0.01	0.5714	0.01	0.5714	0.0075	0.4	0.0075	0.4	0.0111	0.4167	0.0111	0.4167	0.0263	0.7333	0.0263	0.7333	0	0.625	0.0005	0.75	0.0005
14.8333	0	0	0	0	0	1	0	0	0	0	1	0	0	0.52			369	68	36	51	41.23			252			4.1	-10.7
14.9333	0	0	1	0	0	0	0	0	0	0	0	0	0	1.04	0.31	247	240	65	85	54	23.35			263			8.9		0.03	0.4286	0.03	0.4286	0.028	0.3	0.028	0.3	0.0288	0.25	0.0288	0.25	0.0321	0.6667	0.0391	0.6	0.0012	0.5625	0.0391	0.6	0.0012
15.0333	0	1	0	0	0	0	0	0	0	0	1	0	0	0.18		3765	834	64	52	58	25.81			183			26.2		0.01	0.2857	0.01	0.2857	0.0075	0.2	0.0075	0.2	0.0111	0.1667	0.0111	0.1667	0.032	0.3333	0.032	0.3333	0.0009	0.3125	0.0009	0.3125	0.0009
15.0667	0	0	0	0	0	0	0	0	0	0	1	0	0	0.14	0.1	1327	577	98	35	99	23.8	0.13		327	6.1		9.2	3.1	0.16	0.1429	0.01	0.4286	0.0436	0.1	0.0027	0.3	0.0247	0.0833	0.0024	0.25	0.2803	0.2	0.0384	0.5333
15.2333	1										1	0	0	0.21							8.64	31.18		124			8.5		0.01	0.5714	0.01	0.5714	0.0075	0.4	0.0075	0.4	0.0111	0.3333	0.0111	33.33	0.0263	0.6667	0.0263	0.6667					0.0005
15.3	0	0	0	0	0	0	0	0	0	0	1	0	0	0.25			928		24	78	20.55	42.08	95	209	5.5		8.4		0.00191332	0.285714	0.00191332	0.285714	0.00333248	0.2	0.00333248	0.2	0.00665804	0.166667	0.00665804	0.166667	0.0704367	0.4	0.0704367	0.4	0.000480597	0.3125	0.000480597	0.3125	0.000480597
15.9	1	0	0	0	0	0	0	0	0	0	1	0	0								4.53		114	252	6.1		10.2		0.0075923	0.428571	0.0075923	0.428571	0.00750912	0.3	0.00750912	0.3	0.011055	0.25	0.011055	0.25	0.0580307	0.666667	0.0580307	0.666667	0.000480597	0.625	0.000480597	0.625	0.000480597
16.1	0	0	0	0	0	0	0	0	0	0	1	0	0			568	733		46	55	32.09	8.74		485			27.9		0.01	0.2857	0.01	0.2857	0.0097	0.2	0.0134	0.2	0.013	0.1667	0.016	0.1667	0.0397	0.5333	0.0266	0.6	0.0012	0.4375	0.0005	0.625	0.0012
16.1311	0	0	0	1	1	0	0	0	0	0	1	0	0								14.15			244	4.93		5.6		0.054218	0.285714	0.0284429	0.428571	0.0430043	0.2	0.0279524	0.3	0.0362487	0.166667	0.0288195	0.25	0.0318762	0.533333	0.0577308	0.6	0.000480597	0.4375	0.00118125	0.5	0.000480597
17.9	0	0	0	0	1	0	0	0	0	0	1	0	0	0.26		404	304	84	35	102	6.67			120			14.1	-3.7	0.02	0.4286	0.02	0.4286	0.0127	0.2	0.0127	0.2	0.0152	0.1667	0.0152	0.1667	0.0572	0.4	0.0572	0.4
18.3333	1	1	0	0	0	0	0	0	1	0	0	0	0	0.15							35.7			43			0.1	3.9	0.01	0.5714	0.01	0.7143	0.0092	0.4	0.0075	0.5	0.0118	0.3333	0.0111	0.4167	0.0115	0.3333	0.0316	0.7333					0.0012
18.6	0	0	0	1	0	0	0	1	1	0	1	0	0	0.22	1.7	12252	142	31	60	44	8.76	13.4	112	35			2.9		0.0167083	0.285714	0.139074	0.285714	0.0126921	0.2	0.206746	0.2	0.0151698	0.166667	0.396431	0.166667	0.324756	0.266667	0.10147	0.266667	0.0414871	0.3125	0.323004	0.3125	0.0414871
18.7333	1	1	0	0	0	1	0	0	1	1	1	0	0			6489	273	27	64	38	22.8	38.28	78	14			0.3		0.0075923	0.285714	0.0075923	0.285714	0.00750912	0.2	0.00750912	0.2	0.011055	0.166667	0.011055	0.166667	0.421163	0.133333	0.20538	0.266667	0.840238	0.0625	0.0962155	0.25
19.1667	1	0	0	0	0	1	0	0	0	0	0	0	0	0.93	32.42	350	324	66	210	36	53.52			27			36.8		0	0.7143	0	0.7143	0.0011	0.5	0.0011	0.5	0.0065	0.4167	0.0065	0.4167	0.0252	0.8	0.0252	0.8	0.0232	0.6875	0.0232	0.6875	0.0232
19.2333	1	0	0	1	0	0	0	0	0	0	1	0	0	0.34							43.26			359			9.3	-1
19.3443	1	0	0	0	0	0	0	0	1	0	1	0	0			4204	776	48	52	42	34.48	8.7		45			1.2		0.0167247	0.285714	0.00996166	0.428571	0.0222993	0.2	0.0158377	0.3	0.0371866	0.166667	0.0320135	0.25	0.0113795	0.333333	0.100879	0.4	0.0172932	0.3125	0.0962155	0.25	0.0172932
19.4667	1	0	0	0	0	1	0	0	0	0	1	0	0	0.17							23.91	6.4		84			13.9		0.01	0.5714	0.01	0.5714	0.0075	0.4	0.0075	0.4	0.0111	0.3333	0.0111	0.3333	0.0257	0.7333	0.0257	0.7333
19.5	1	0	0	0	0	1	0	0	0	0	1	0	0	0.63		306	336	50	45	67	14			90			40.2	0.7
19.5667	1	0	0	0	0	0	0	0	0	0	1	0	0	0.25		313	357	103	36	100	0.78	0.11	110	447			10.7		0.0426558	0.285714	0.0426558	0.285714	0.0366184	0.2	0.0366184	0.2	0.0319689	0.166667	0.0319689	0.166667	0.0569471	0.266667	0.0569471	0.266667	0.000480597	0.25	0.000480597	0.25	3.34144e-134
19.8333	1	0	0	0	0	0	0	0	0	1	1	0	0	0.3		14995	503	82	35	91	3.28	0.18		453			13.1		0.01	0.5714	0.01	0.5714	0.0075	0.4	0.0075	0.4	0.0111	0.3333	0.0111	0.3333	0.0257	0.6667	0.0257	0.5625	0	0.5625	0	0.5625	0.0005
19.9333	0	0	0	0	1	0	0	0	0	0	1	0	0	0.28		5088	446	73	46	58	7.79	24.93		147			4.2	-3	0.01	0.2857	0.01	0.2857	0.0075	0.2	0.0075	0.2	0.0111	0.1667	0.0111	0.1667	0.0834	0.3333	0.0834	0.3333	0.0009	0.25	0.0009	0.25	0.0009
20.5246	1										1	0	0			9444	215	27	70	47	24.74			44			13.7		0.139074	0.285714	0.139074	0.285714	0.206746	0.2	0.206746	0.2	0.366604	0.25	0.366604	0.25	0.75371	0.0666667	0.75371	0.0666667	0.79576	0.0625	0.79576	0.0625	0.465057
21.0164	0						1				0	0	0					73			4.42			496	8.7		20		0.061054	0.285714	0.0471555	0.285714	0.0172389	0.2	0.0144209	0.2	0.00769945	0.166667	0.00686446	0.166667	0.0684976	0.0666667	0.238486	0.2	0.0232029	0.0625	0.0962155	0.0625	0.0232029
21.377	1	0	1	0	0	0	0	0	0	0	1	0	0								34.19	9.16		267			16.2		0.0075923	1	0.0075923	1	0.00750912	1	0.00750912	1	0.011055	1	0.011055	1	0.0254069	0.8	0.0254069	0.8	0.000480597	0.625	0.000480597	0.625	0.000480597
21.4	1	0	0	0	0	0	0		0	0	1	0	0								13.34		102	915	12.6		21		0.0133079	0.285714	0.0133079	0.285714	0.0109063	0.2	0.0109063	0.2	0.0131651	0.166667	0.0131651	0.166667	0.0564124	0.533333	0.0564124	0.533333	0.000480597	0.5625	0.000480597	0.5625	0.000480597
21.7	1	0	0	0	0	0	0	0	0	0	1	0	0	0.17			326	120	28	107	0.06		139	372	4.8		15.6		0.00161791	0.428571	0.00161791	0.428571	0.00298163	0.3	0.00298163	0.3	0.00648627	0.25	0.00648627	0.25	0.0254565	0.733333	0.0254565	0.733333	0.000480597	0.5	0.000480597	0.5	0.000480597
22.9333	0	1	0	0	0	1	0	0	0	0	1	0	0	0.55							2.06			338			8		0.03	0.4286	0.03	0.4286	0.0283	0.4	0.0283	0.4	0.0289	0.4167	0.0289	0.4167	0.0231	0.3333	0.0231	0.3333	0.0009	0.25	0.0009	0.25	0.0009
23.2333	1	0	1	0	0	0	1	0	0	0	1	0	1	2.81	0.51	4065	582		51	87	16.57			57			25.4	-1.9	0.01	0.2857	0.01	0.2857	0.0089	0.2	0.0089	0.2	0.0116	0.1667	0.0116	0.1667	0.0239	0.4	0.0239	0.4	0.0071	0.375	0.0071	0.375	0.0071
23.8	0	0	1	0	1	1	0	0	0	1	0	0	0			10123	436	62	55	49	39.51	6.79		21	5.3		5.7		0.239942	0.285714	0.469065	0.142857	0.387971	0.2	0.652784	0.1	0.576379	0.166667	0.720726	0.166667	0.41411	0.4	0.927641	0.133333	0.0310685	0.375	0.465057	0.0625	0.0310685
24.1667	0	0	0	0	1	1	0	0	0	1	0	0	0	0.13	0.96	10.123	357	6.2	55	48	39.51	4.37	125	18	92		39		0.0435216	0.428571	0.986836	0.285714	0.0371137	0.3	0.997984	0.2	0.0322471	0.25	0.999741	0.166667	0.119308	0.466667	0.710744	0.0666667	0.00118125	0.4375	0.26115	0.1875	0.00118125
24.8	1	0	0	0	0	0	0	0	0	0	0	0	0	0.71	0.18	651	119	32	114	24	2.15	450.58		90			4.4
26.4	1	0	0	0	0	0	0	0	1	0	1	0	0	0.38	0.29		511	57	64	58	29.01			63			0.2		0.05	0.7143	0.05	0.7143	0.0391	0.5	0.0391	0.5	0.0536	0.4167	0.0536	0.4167	0.0668	0.7333	0.0668	0.7333	0.0173	0.625	0.0173	0.625	0.0129
26.5	0	0	0	0	0	0	0	0	0	0	1	0	0	0.51	0.45		465	115	60	40	45.77			50			16.6
26.9	0	0	0	0	1	1	0	1	0	0	1	0	0	0.62	12.86	3683	133	20	98	40	2.4	92.03	74	35	5.1		10.9		0.00261989	0.285714	0.00161791	0.428571	0.021699	0.2	0.0158377	0.3	0.0364664	0.166667	0.0320135	0.25	0.818319	0.2	0.0452607	0.4	0.00710377	0.3125	0.0128688	0.25	0.00710377
27.3333	0	0	0	0	0	0	0	0	1	0	1	0	0								13.91		80	184			6.2		0.0867484	0.285714	0.0867484	0.285714	0.0606055	0.2	0.0606055	0.2	0.0141518	0.166667	0.0141518	0.166667	0.0550963	0.6	0.0550963	0.6	0.00087536	0.5625	0.00087536	0.5625	0.00087536
27.4667	1	0	0	0	0	0	0	0	1	0	1	0	0	0.38			453	83	46	80	6.87			73			4.3	-2.7	0.05	0.5714	0.01	0.5714	0.0391	0.4	0.0391	0.4	0.0536	0.3333	0.0536	0.3333	0.0073	0.6667	0.0247	0.5333
28	1	0	0	0	0	0	0	0	0	0	1	0	0			278	813	96	37	76	17.87			357			19.1		0.01	0.4286	0.01	0.4286	0.0075	0.3	0.0075	0.3	0.0111	0.3333	0.0111	0.3333	0.0246	0.5333	0.0246	0.5333	0.0005	0.4375	0.0005	0.4375	0.0005
28.6667	0	0	0	0	0	0	0	0	0	0	1	0	0	0.37							19.7	9.84					16
29.1667	0	0	0	0	1	1	1	0	0	0	1	0	0	1.06	0.28	3.962	507	47	60	47	28.38	125.62	79	179	68		4.6		0.0314927	0.285714	0.0284429	0.285714	0.0299113	0.2	0.0279524	0.2	0.0292103	0.166667	0.0288195	0.166667	0.054578	0.133333	0.0246024	0.133333	0.00527231	0.125	0.00956532	0.125	0.00215029
29.2333	0	1	0	0	0	0	0	0	0	0	1	0	1	0.23			677				13.69								0.01	0.2857	0.01	0.4286	0.0108	0.2	0.0075	0.3	0.013	0.1667	0.0111	0.25	0.0546	0.2	0.0246	0.4	0	0.1875	0.0005	0.4375	0
29.4667	1	0	1	0	0	0	0	0	0	0	1	0	0	26	0.1	3554	442	86	30	84	5.61		104	317			16.2	-1.3	0.793311	0.285714	0.287614	0.285714	0.842035	0.2	0.208185	0.2	0.886148	0.166667	0.171595	0.166667	0.966203	0.0666667	0.065989	0.0666667	0.840238	0.0625	0.00118125	0.0625	0.742691
29.7333	1	0	0	0	0	0	0	0	0	0	1	0	0	0.36	0.48	600	968	111	40	86	18.28			410			11.6		0.02	0.2857	0.02	0.2857	0.015	0.3	0.015	0.3	0.0185	0.25	0.0185	0.25	0.0244	0.4667	0.0244	0.4667	0.0005	0.4375	0.0005	0.4375	0.0005
29.8333	0	0	0	0	0	0	0	0	1	0	1	0	0	0.1		583	195	33	59	56	4.94	1.69	95	12			0.6		0.0160479	0.285714	0.0160479	0.285714	0.021699	0.2	0.021699	0.2	0.0364664	0.166667	0.0364664	0.166667	0.139194	0.333333	0.139194	0.333333	0.0172932	0.3125	0.0172932	0.3125	0.0172932
30.2	0	0	0	0	0	1	1	0	0	1	1	0	0	0.18							8.7		86	87	3.7		4.5		0.00954639	0.285714	0.0075923	0.285714	0.00874361	0.2	0.00750912	0.2	0.0115219	0.2	0.011055	0.166667	0.0244827	0.533333	0.0543206	0.533333	0.0128688	0.4375	0.00290041	0.4375	0.000480597
31.1667	1	0	1	0	0	1	0	1	0	0	1	0	0	0.39	1.14	2388	198	41	82	20	23.39			34			2.3	-0.6
31.2459	1	1							1	1	1	0	0			3835	650	125	29		14.05			43			0.2		0.372385	0.285714	0.372385	0.285714	0.497375	0.2	0.497375	0.2	0.726781	0.166667	0.726781	0.166667	0.164379	0.533333	0.164379	0.533333	0.162465	0.4375	0.162465	0.4375	0.162465
31.6667	1	1	0	0	1	0	0	0	0	0	0	0	0	0.57	0.48	340	251	62	68	30	17.51			72			30.3	3.1	0.07	28.575	0.07	28.575	0.101	0.2	0.101	0.2	0.0667	0.25	0.0667	0.25	0.079	0.2667	0.079	0.2667
32.0333	1	0	0	0	1	0	0	0	0	0	1	0	0	0.84			1156		46	99	32.28			162			17.4	-4.7	0.01	0.57145	0.01	0.57145	0.0027	0.4	0.0027	0.4	0.0046	0.3333	0.0046	0.3333	0.0364	0.667	0.0364	0.667
33.377	1	0	0	0	0	0	0	0	0	1	1	0	0			1183	406	73	51	80	8.93	13.68		147	3.6		5.9		0.0075923	0.285714	0.0075923	0.285714	0.00750912	0.2	0.00750912	0.2	0.011055	0.166667	0.011055	0.166667	0.0532015	0.466667	0.0532015	0.466667	0.00215029	0.3125	0.00215029	0.3125	0.00215029
33.9333	1	0	0	0	1	0	0	0	0	0	1	0	0	0.49		1183	406	73	51	80	8.93	13.68		147	3.6		5.9	-6.1	0.01	0.4286	0.01	0.4286	0.0075	0.3	0.0075	0.3	0.0111	0.25	0.0111	0.25	0.0533	0.4	0.0533	0.4
34.1667	1	0	0	0	0	0	0	0	0	1	1	0	0	0.17		34096	235	59	51	51	22.68	7.28		36	1		1.5		0.01	0.5714	0.01	0.5714	0.0075	0.4	0.0075	0.4	0.0111	0.3333	0.0111	0.3333	0.1142	0.4667	0.0648	0.4
34.1967	0	0	0	1	0	0	0	0	0	0	1	0	0								11.15	8.47		88			9.9		0.049079	0.285714	0.049079	0.285714	0.0402235	0.2	0.0402235	0.2	0.0342033	0.166667	0.0342033	0.166667	0.0644045	0.4	0.0644045	0.4	0.00159386	0.4375	0.00159386	0.4375	0.00159386
34.3667	0	0	0	0	0	0	0	0	0	1	1	0	0	0.31	0.44		890	65	106	96	44.44			249			14.5	-7.3
34.8333	1	0	0	0	0	0	0	0	0	0	1	0	0	0.19		1037	682	65	31		11.29	56.02		34	8		11.2	1.2	0.01	0.5714	0.01	0.5714	0.0075	0.4	0.0075	0.4	0.0111	0.3333	0.0111	0.3333	0.0434	0.5333	0.0434	0.5333	0.0022	0.4375	0.0022	0.4375	0.0022
34.9333	1	0	0	0	0	0	0	0	1	0	1	0	0	0.38							9.87			16			0.5		0.01	0.8571	0.01	0.8571	0.0391	0.8	0.0391	0.8	0.0536	0.75	0.0536	0.75	0.0238	0.8667	0.0238	0.8667	0.0071	0.6875	0.0071	0.6875	0.0071
35	1	0	1	0	1	0	1	0	0	0	1	0	0	1.49	0.28	4767	786	75	47	89	32.97			197	31.1		35.2	-13.7	0.01	0.4286	0.01	0.4286	0.0075	0.3	0.0075	0.3	0.0111	0.25	0.0111	0.25	0.0105	0.6667	0.0105	0.6667	0.0039	0.5625	0.0039	0.5625	0.0012
35.1333	0	0	0	0	0	0	0	0	0	0	1	0	0	0.3							1.73		126	147	4		6.8		0.0284429	0.285714	0.0284429	0.285714	0.0279524	0.2	0.0279524	0.2	0.0288195	0.166667	0.0288195	0.166667	0.0238927	0.666667	0.0238927	0.666667	0.00087536	0.5	0.00087536	0.5	0.00087536
36	1	0	0	0	0	0	0	0	1	0	1	1	0	0.51	0.59	14598	534	59	58	48	48.45	159.02		134	11.5		16.3	-2.2	0.08	0	0.09	0	0.0585	0	0.0235	0	0.0524	0	0.0233	0	0.498	0.0667	0.0764	0.0667
37.541	1			1	0	0	0	0	0	0	1	0	0				518	90	43	77	24.21			211	6.7		8.4		0.0112731	0.285714	0.00934986	0.285714	0.00976585	0.2	0.00862353	0.2	0.0121836	0.166667	0.0114592	0.166667	0.0234879	0.4	0.0634174	0.333333	0.000480597	0.3125	0.00527231	0.25	0.000480597
37.5667	1	1	0	0	1	1	0	0	0	1	1	0	0	0.59	1.8	9889	564	60	45	74	20.36	15.35	134	55			9		0.0974572	0.285714	0.78279	0.285714	0.109178	0.2	0.836389	0.2	0.136207	0.166667	0.894755	0.166667	0.776086	0.0666667	0.160434	0.0666667	0.977246	0.125	0.26115	0.125	0.465057
37.6	1	1	0	0	0	0	0	0	0	0	1	0	0	0.43	0.26	2292	1070	45	57	42	38.89			66			13.9	-5.6	0.06	0.1429	0.01	0.1429	0.0706	0.1	0.0142	0.1	0.055	0.0833	0.0176	0.0833	0.2623	0.4	0.0235	0.4	0.0962	0.25	0.0053	0.3125	0.0096
37.7	0	1	1	1	0	0	0	1	0	1	1	0	0	0.29		666	158	84	64	48	13.94	49.8	98	26			0.2		0.014774	0.285714	0.0227762	0.285714	0.0205456	0.2	0.0273475	0.2	0.0352056	0.166667	0.0448793	0.166667	0.551813	0.333333	0.224262	0.333333	0.0962155	0.3125	0.0414871	0.3125	0.0128688
39.9	1	1	0	0	0	0	0	1	0	1	1	0	0			1322	676	51	50	52	33.26			397	26.9		37.9	-13.4	0.01	0.5714	0.01	0.4286	0.0095	0.4	0.0114	0.3	0.012	0.3333	0.0136	0.25	0.0774	0.5333	0.0237	0.6667	0.0012	0.5625	0.0009	0.625	0.0005
41.1	0	0	0	0	1	0	0	0	0	0	1	0	0	0.42	0.3		456	87	28	93	5.66	8.7	101	251			24.5	4.2	0.0598611	0.428571	0.989738	0.285714	0.0459681	0.3	0.998294	0.2	0.0387297	0.25	0.999788	0.166667	0.221663	0.133333	0.0232029	0.133333	0.00215029	0.125	0.00118125	0.125	0.00118125
41.7333	0	0	0	0	0	0	0	1	0	0	1	0	0	0.29	7.92		462	58	44	72	30.4	11.71		195			20	2
41.8667	0	0	0	0	0	0	0	0	0	0	1	0	0	0.47	0.29	6500	738	81	52	44	18.07	86.85		61	29		35.8	-3.9	0.01	0.2857	0.02	0	0.0111	0.2	0.0198	0	0.0133	0.1667	0.0198	0	0.0421	0.2667	0.0421	0.2667	0.0311	0.25	0.0096	0.25	0.0173
41.9333	0	0	0	0	1	0	0	0	0	0	1	0	0	0.36			929	90	33	91	15.6	8.74	113	290	14.2		18.9		0.0075923	0.428571	0.0075923	0.428571	0.00750912	0.3	0.00750912	0.3	0.011055	0.25	0.011055	0.25	0.0230899	0.6	0.0230899	0.6	0.000480597	0.4375	0.000480597	0.4375	0.000480597
42.0328	0	0	0	0	0	0	1	0	0	0	0	0	0			35000	117	45	72	25	1.51			50	7.5		8		0.860146	0.142857			0.916652	0.1			0.948255	0.0833333	1	0.0833333	0.983952	0.0666667	0.980276	0.133333	0.997157	0.0625	0.945833	0.0625	0.876533
42.3333	0	0	0	0	0	0	0	0	0	0	1	0	0	0.51		3236	966	66	38	55	29.09			81			18.3		0.01	0.4286	0.01	0.4286	0.0075	0.3	0.0075	0.3	0.0111	0.25	0.0111	0.25	0.2572	0.5333	0.0229	0.6	0.0053	0.375	0.0039	0.5	0.0053
43.1	0	0	0	0	1	0	0	0	0	0	1	0	0								3.32		134	534	7.4		14.9		0.0075923	0.285714	0.0075923	0.285714	0.00750912	0.2	0.00750912	0.2	0.011055	0.166667	0.011055	0.166667	0.0229774	0.666667	0.0229774	0.666667	0.000480597	0.625	0.000480597	0.625	0.000480597
43.1667	0	0	0	0	0	0	0	0	0	0	1	0	0	0.41							1.3		132	250	10		17.9		0.0075923	0.428571	0.0075923	0.428571	0.00750912	0.3	0.00750912	0.3	0.011055	0.25	0.011055	0.25	0.0229774	0.733333	0.0229774	0.733333	0.000480597	0.5625	0.000480597	0.5625	0.000480597
44.8	1	0	0	0	0	0	0	0	0	1	1	0	0	0.33							26.36		108	365	37.4		43.7		0.0075923	0.285714	0.0075923	0.285714	0.00750912	0.2	0.00750912	0.2	0.011055	0.166667	0.011055	0.166667	0.0227539	0.533333	0.0227539	0.533333	0.000480597	0.4375	0.000480597	0.4375
45.5	1	0	0	0	0	0		0	0	0	1	0	0	0.56	0.78	10421	675	76	46	85	33.31	28.7		153	16.5		18.8	-5.2	0.01	0.5714	0.01	0.5714	0.0075	0.4	0.0075	0.4	0.0111	0.3333	0.0111	0.3333	0.0107	0.5333	0.0107	0.5333
46.3333	0	0	0	1	0	0	0	0	0	0	1	0	0	0.45							26.76			515			35.4		0.01	0.7143	0.01	0.7143	0.0075	0.5	0.0075	0.5	0.0111	0.4167	0.0111	0.4167	0.0388	0.7333	0.0318	0.8	0	0.625	0	0.6875	0
47.2667	1										1	0	0			2873	1252				31.49								0.01	0.2857	0.01	0.2857	0.0103	0.2	0.0103	0.2	0.0126	0.1667	0.0126	0.1667	0.0085	0.3333	0.0085	0.3333	0.0009	0.3125	0.0009	0.3125	0.0005
47.4	0	0	0	0	0	0	1	0	0	0	1	0	0	0.38		1046	838	125	38	87	30.8			101			25.5		0.01	0.4286	0.01	0.4286	0.0094	0.3	0.0094	0.3	0.0119	0.25	0.0119	0.25	0.0335	0.5333	0.0335	0.5333	0.0009	0.5	0.0009	0.5	0.0009
47.7	1	0	0	0	0	1	1	0	0	1	1	0	0	0.21	1.63	1495	579	68	34	92	11.77	10.85	94	81	5.3		6.7		0.0075923	0.285714	0.0170568	0.285714	0.00750912	0.2	0.0128681	0.2	0.011055	0.166667	0.0153975	0.166667	0.0498785	0.2	0.0224228	0.2	0.00159386	0.25			0.00087536
48.0328	0										0	0	0								22.23			29							0.01	1			0.0075	1			0.0111	1			0.0223	1			0.0071	0.875
48.0328	0										0	0	0			33969	117	45			1.51			50					0.860146	0.142857			0.916652	0.1			0.948255	0.0833333	1	0.0833333	0.983952	0.0666667	0.980276	0.133333	0.997157	0.0625	0.945833	0.0625	0.876533
48.6667	0	0	0	0	1	0	0	0	0	0	1	0	0	0.34							13.18			8			20.6		0.01	0.4286	0.01	0.4286	0.0075	0.3	0.0075	0.3	0.0111	0.25	0.0111	0.25	0.0732	0.2667	0.0732	0.2667	0.0022	0.25	0.0022	0.25	0.0022
48.918	1	0	0	0	0	0	0	0	0	1	1	0	0				632		33	80	25.37			159	2.81		7.8		0.0075923	1	0.0075923	1	0.00750912	1	0.00750912	1	0.011055	1	0.011055	1	0.00651896	0.733333	0.00651896	0.733333	0.00087536	0.625	0.00087536	0.625	0.00087536
49.6333	1	0	0	0	1	0	0	0	0	0	1	0	0	1.88		28692	390	74	40	79	4.01			100			12.7	9.8	0.09	0	0.07	0.1429	0.0875	0	0.051	0.1	0.0876	0	0.0472	0.0833	0.2148	0.2667	0.0407	0.2	0.0962	0.25	0.0173	0.1875	0.0962
50.0667	1	0	0	0	0	0	0	0	0	1	1	0	0	0.28		566	806	91	36	126	14.36			265	10.3		14.1	-1.5	0.01	0.4286	0.01	0.4286	0.0075	0.3	0.0075	0.3	0.0111	0.25	0.0111	0.25	0.0741	0.4	0.0741	0.4
50.2667	0	0	0	0	1	0	0	0	0	0	1	0	1	0.59		838	469	49	50	46	9.59			219			16.4		0.07	0.2857	0.07	0.2857	0.019	0.2	0.019	0.2	0.0438	0.1667	0.0438	0.1667
52.1333	1	0	0	0	0	0	0	0	0	0	1	0	0	0.54							0.1		111	281	1.5		6.6		0.00187363	0.285714	0.00187363	0.285714	0.00328647	0.2	0.00328647	0.2	0.00662841	0.166667	0.00662841	0.166667	0.0219885	0.466667	0.0219885	0.466667	0.000480597	0.375	0.000480597	0.375	0.000480597
52.1667	0	0	0	0	0	0	0	1	0	0	1	0	0	0.34	6.07		418	46	41	63	21.64			177			7.6
53.7	0	0	0	0		0	0	0	0	0	1	0	0	0.26		4423	653	61	51	85	27.3	14.16		240			13.6	-4.7	0.03	0	0.02	0	0.0289	0	0.0176	0	0.0256	0	0.0192	0	0.126	0.1333	0.179	0.0667
54.8333	0	0	0	0	0	0	1	0	1	0	1	0	0	0.89	4.71		467	42	62	49	23.89			38			0.1	-1
56.1333	1	0	0	0	0	0	0	0	1	0	1	0	0	0.37	1.93						10.34			20			0.8		0.05	0.7143	0.05	0.7143	0.0391	0.5	0.0391	0.5	0.0536	0.4167	0.0536	0.4167	0.0392	0.7333	0.0392	0.7333	0.0096	0.625	0.0096	0.625	0.0096
56.5333	1	0	0	0	0	0	0	0	1	0	1	0	0	0.76	0.75		513	64	51	67	41.31			385			5.4	3
56.8525	0										1	0	0			2897	761		45	78	20.61	18.69		365	31.1		35.8		0.01	0.4286	0.01	0.4286	0.0075	0.3	0.0075	0.3	0.0111	0.25	0.0111	0.25	0.0482	0.6	0.0217	0.7333	0.0029	0.4375	0.0005	0.625	0.0029
58.2623	1	0	0	0	0	0	0	0	0	1	1	0	0								9.17			377	2.4		6.2		0.00842576	0.285714	0.0075923	0.428571	0.00290402	0.2	0.0027089	0.3	0.00248179	0.166667	0.00244769	0.25	0.0239511	0.266667	0.00703708	0.533333	0.000480597	0.3125	0.000480597	0.625	0.000480597
58.3333	1	0	0	0	0	0	1	0	1	0	1	0	0	0.22							9.51			154	0.6		2.4		0.02	28.575	0.01	0.4286	0.0208	0.2	0.0158	0.3	0.0355	0.1667	0.032	0.25	0.0094	0.4	0.0212	0.7333
58.3667	0										0	0	0			367	84	47			10.38			9					0.01	0.4286	0.05	0.4286	0.0391	0.3	0.285	0.3	0.0536	0.25	0.2168	0.25	0.0396	0.5333	0.2462	0.5333	0.0173	0.5	0.2611	0.375	0.0173
58.7	0	0	0	0	0	0	1	0	0	0	1	0	0	1.56	0.29	3094	959	77	43	100	22.16			26			21.8		0.01	0.5714	0.01	0.5714	0.0075	0.4	0.0075	0.4	0.0111	0.3333	0.0111	0.3333	0.2825	0.5333	0.026	0.6667	0.0552	0.5	0.0096	0.625	0.0053
58.8	0	0	0	0	0	0	1	0	0	0	1	0	0	2.41	2.83	35000	437		31	98	6.04			198	12.8		15.7
59.9	0	0	0	0	0	0	0	0	1	1	1	0	0	0.31		3630	604	69	45	82	24.08	1.81	101	8			0.1		0.00996166	0.285714	0.0112731	0.571429	0.0158377	0.2	0.00976585	0.7	0.0320135	0.166667	0.0121836	0.75	0.0211446	0.266667	0.0842465	0.4	0.0172932	0.3125			0.00710377
60	1	0	0	0	0	0	0	0	0	0	1	0	0	0.36							0.97		117	198	3		10.5		0.0075923	0.285714	0.0075923	0.285714	0.00750912	0.2	0.00750912	0.2	0.011055	0.166667	0.011055	0.166667	0.0211446	0.733333	0.0211446	0.733333	0.00087536	0.5	0.00087536	0.5	0.00087536
60.2667	0	1	1	0	1	0	0	0	0	1	0	0	0		0	1584	236	64	29	77	0.54	27.18	128	319	49.8		7.4		0.276078	0.285714	0.243792	0.285714	0.418168	0.2	0.391288	0.2	0.584715	0.166667	0.575101	0.166667	0.146165	0.266667	0.672387	0.2	0.125648	0.3125	0.0731012	0.375	0.0414871
61.3667	1	0	0	0	0	0	0	0	0	0	1	0	0								0.89		135	170	6.1		170		0.00866866	0.142857	0.00866866	0.142857	0.00823509	0.1	0.00823509	0.1	0.0126417	0.0833333	0.0126417	0.0833333	0.121639	0.4	0.121639	0.4	0.00087536	0.375	0.00087536	0.375	0.00087536
61.4	1	0	0	0	0	0	0	0	0	0	1	0	0	0.38							2.47		101	221	5.1		13		0.0075923	0.285714	0.0075923	0.285714	0.00750912	0.2	0.00750912	0.2	0.011055	0.166667	0.011055	0.166667	0.0210413	0.666667	0.0210413	0.666667	0.000480597	0.5	0.000480597	0.5	0.000480597
62.5333	0	1	0	0	1	0	0	0	0	1	1	0	0	1.55	0.8	7314	256	42	74	43	3.57	313.96	116	156			3.6		0.262503	0.428571	0.262503	0.428571	0.0430043	0.3	0.0430043	0.3	0.0362487	0.25	0.0362487	0.25	0.144922	0.133333	0.144922	0.133333	0.539915	0.125	0.539915	0.125	0.26115
62.8333	1	1	0	0	0	0	1	0	1	0	1	0	0	0.26							15.38		92	159	5.4		7.5		0.0362987	0.285714	0.0075923	0.428571	0.0328787	0.2	0.00750912	0.3	0.0301851	0.166667	0.011055	0.25	0.100743	0.333333	0.0209386	0.666667	0.00527231	0.3125	0.00087536	0.5625	0.00118125
64.6557	0	0	0	0	0	0	0	0	1	0	1	0	0			654	430	94	35	82	13.77	6.56		14			0.2		0.011751	0.285714	0.011751	0.285714	0.0100394	0.2	0.0100394	0.2	0.0123967	0.166667	0.0123967	0.166667	0.0205627	0.2	0.0205627	0.2	0.0414871	0.1875	0.0414871	0.1875	0.00710377
66.5574	0										1	0	0								31.32			27			0		0.00996166	0.428571	0.00996166	0.428571	0.0158377	0.3	0.0158377	0.3	0.0320135	0.25	0.0320135	0.25	0.0166264	0.466667	0.0553049	0.6	0.0172932	0.4375	0.0172932	0.5	0.0172932
66.6333	1	0	0	0	0	0	0	0	1	0	1	0	0	1.24							16.44			109	6.1		7.4		0.34	0	0.43	0	0.4767	0	0.5791	0	0.6274	0	0.7028	0	0.9671	0.0667	0.4653	0.2667
68.3	1	0	0	0	0	0	0	0	0	1	1	0	0	0.4	0.51	640					30.39			261	17.3		19.6	-0.8	0.01	0.5714	0.01	0.5714	0.0075	0.4	0.0075	0.4	0.0111	0.3333	0.0111	0.3333	0.009	0.5333	0.0304	0.8			0.0012	0.75	0
69.4426	1										1	0	0								8.94			12			0.1		0.07	0.2857	0.05	0.4286	0.0517	0.2	0.0391	0.3	0.0598	0.1667	0.0536	0.25	0.0839	0.3333	0.0315	0.5333	0.1256	0.375	0.0071	0.4375	0.1256
69.7667	1					1		1			0	0	0			1506	668	58			40.43			103					0.24	0.4286	0.53	0.2857	0.1833	0.3	0.5958	0.2	0.7987	0.25	0.9304	0.1667	0.0439	0.4667	0.7012	0.3333	0.0731	0.4375	0.9282	0.25	0.0731
69.9667	1	1	0	0	0	0	0	0	0	0	1	0	0			478	1357	85	33	85	40.17			170			12.1		0.01	0.4286	0.01	0.4286	0.0075	0.3	0.0075	0.3	0.0111	0.25	0.0111	0.25	0.02	0.5333	0.02	0.5333	0.0022	0.4375	0.0022	0.4375	0.0012
71.1333	0	0	0	1	0	0	0	0	0	1	1	0	0								7.57		125	240	12.5		14		0.0075923	0.285714	0.0075923	0.285714	0.00750912	0.2	0.00750912	0.2	0.011055	0.166667	0.011055	0.166667	0.0200357	0.733333	0.0200357	0.733333	0.000480597	0.625	0.000480597	0.625	0.000480597
71.2667	1	1	0	0	0	0	0	0	0	0	1	0	0	1.31	0.43						8.72			221			1.2		0.05	0.8571	0.05	0.8571	0.0391	0.7	0.0391	0.7	0.0316	0.75	0.0316	0.75	0.0062	0.6	0.021	0.8	0.0012	0.5625	0.0022	0.6875	0.0012
72.459	0									1	0	0	0			231	521	67	91	81	25.88	0.42		63			21		0.0284429	0.571429	0.0284429	0.571429	0.0102183	0.4	0.0102183	0.4	0.0798079	0.333333	0.0798079	0.333333	0.0641939	0.533333	0.0641939	0.533333	0.0310685	0.375	0.0310685	0.375	0.00710377
73.4333	1	0	0	0	0	0	0	0	0	0	1	0	0	0.43		358	685	72	55	37	36			172			30.4		0.01	0.4286	0.01	0.4286	0.0075	0.3	0.0075	0.3	0.0111	0.25	0.0111	0.25	0.0536	0.6	0.0536	0.6	0.0022	0.5	0.0022	0.5	0.0022
73.4333	1	0	0	0	0	0	0	0	0	0	1	0	0	0.46							7.26		131	146	9.8		11.6		0.0157042	0.285714	0.0157042	0.285714	0.0121783	0.2	0.0121783	0.2	0.0145359	0.166667	0.0145359	0.166667	0.0654976	0.466667	0.0654976	0.466667	0.00215029	0.375	0.00215029	0.375	0.00215029
75.5	1	0	0	0	0	1	0	0	0	0	1	0	0	0.42		212	517		35	84	11.01			97	1.8		4.1		0.01	0.4286	0.01	0.4286	0.0075	0.3	0.0075	0.3	0.0111	0.25	0.0111	0.25	0.0198	0.6667	0.0198	0.6667
75.7667	0	1	0	0	0	0	0	0	1	0	1	0	0	0.68	0.34	1977	571	80	34	103	18.7			77	0.1		1.2	-4.6
76.7667	0	1	1	0	1	0	1	0	0	0	1	0	0	2.02	0.47	1958	518	40	52	42	40.51	220.48		50	1.5		1.7	-1	0.03	0.5714	0.03	0.5714	0.028	0.4	0.028	0.4	0.0288	0.3333	0.0288	0.4	0.5082	0.6	0.0959	0.6667	0.1256	0.5	0.0962	0.5625	0.0415
79.1333	1	0	0	0	0	0	1	0	0	0	1	0	0	1.15		287	385	79	56	47	8.99	9.55	92	229	22.4		129		0.0075923	0.285714	0.0075923	0.285714	0.00750912	0.2	0.00750912	0.2	0.011055	0.166667	0.011055	0.166667	0.0430248	0.4	0.0430248	0.4	0.00215029	0.3125	0.00215029	0.3125	0.00215029
79.2	1	0	0	0	0	0	1	0	0	0	0	0	0	1.64	0.87	31046	606	103	77	74	33.03	382.64		36	30.3		39.3	-7	0.09	0	0.14	0	0.1022	0	0.1187	0	0.0722	0.0833	0.087	0	0.9232	0.0667	0.0637	0.0667	0.983	0.0625	0.0552	0.0625	0.9458
79.4098	0								1		1	0	0			4176	778		46	117	19.79	2.68		144			2.1		0.0115096	0.285714	0.0115096	0.285714	0.00990168	0.2	0.00990168	0.2	0.0122876	0.166667	0.0122876	0.166667	0.00688159	0.333333	0.00688159	0.333333	0.00215029	0.4375	0.00215029	0.4375	0.00118125
81.9667	0	1									0	0	0			296	908	83			55.13			141
82	0	0	0	0	0	0	0	0	1	0	1	0	0	0.2	0.69	1681	383	65	77	46	28.34	40.31		27			0.4	0.3	0.16	0	0.16	0	0.124	0	0.124	0	0.1197	0	0.1197	0	0.0519	0.1333	0.0519	0.1333
82.1667	1	0	0	0	0	0	0	0	0	0	1	0	0	0.38			552		35	90	7.58			224			7.3		0.01	0.4286	0.01	0.4286	0.0075	0.3	0.0075	0.3	0.0111	0.25	0.0111	0.25	0.0189	0.5333	0.0189	0.5333	0.0005	0.4375	0.0005	0.4375	0.0005
85.8667	0	0	0	0	0	0	0	0	0	1	1	0	0			697	728	74	60	87	19.07	15.37	111	219	25.9		31.4		0.0075923	0.285714	0.0075923	0.285714	0.00750912	0.2	0.00750912	0.2	0.011055	0.166667	0.011055	0.166667	0.0280314	0.533333	0.0280314	0.533333	0.00118125	0.5	0.00118125	0.5	0.00087536
88.6	1	1	1	0	1	0	0	1	0	0	1	0	0	0.72	0.15		513	106	33	71	14.99			232			7.3	-1	0.01	0.4286	0.01	0.5714	0.0075	0.3	0.0075	0.4	0.0111	0.25	0.0111	0.3333	0.028	0.6	0.0187	0.5333	0	0.5625	0.0006	0.5625	0.0005
91.3333	0	1	0	0	0	0	0	0	0	0	0	0	0	0.53	1.13	598	692	58	40	81	39.7			41			1.3	1.5
92.1	1	0	0	0	0	0	0	0	0	0	1	0	0	0.76			787		31	90	32.05	15.07	115	120	24		14		0.0099518	0.285714	0.0099518	0.285714	0.00898877	0.2	0.00898877	0.2	0.0116601	0.166667	0.0116601	0.166667	0.0181637	0.4	0.0181637	0.4	0.00215029	0.3125	0.00215029	0.3125	0.00215029
92.5	0	0	0	0	1	0	0	0	0	0	1	0	0	0.43	0.34		246		31	85	0.77		125	119	1.2		7.5		0.0075923	0.285714	0.0075923	0.285714	0.00750912	0.2	0.00750912	0.2	0.011055	0.166667	0.011055	0.166667	0.00528807	0.466667	0.00528807	0.466667	0.00215029	0.375	0.00215029	0.375	0.00215029
93.5667	1	0	0	0	1	1	0	0	0	0	1	0	0	0.42	0.96		292	76	56	55	20.3			71			44.7	2
93.5667	1	0	0	0	0	1	0	0	0	0	1	0	0	0.42	0.28		238	76	56	55	20.3			71			33.8	2
93.6667	1	0	0	0	0	0	0	0	1	0	1	0	0	0.84	4.06	1034	295	32	83	22	18.8			28			0.2		0.07	0.4286	0.01	0.7143	0.0491	0.2	0.0075	0.5	0.0417	0.25	0.0111	0.4167	0.028	0.4	0.0343	0.6667
94.4667	0	1	1	0	0	0	0	0	0	0	1	0	0	0.3		255	342	83	26	116	5.42			194			6.8	-1	0	0.4286	0	0.4286	0.003	0.3	0.003	0.3	0.0014	0.25	0.0014	0.25	0.0187	0.8	0.0187	0.6667	0.0005	0.875	0.0005	0.6875	0.0005
96.0333	1	1	0	0	0	0	1	0	0	0	1	0	0	0.63		486	528	97	54	39	19.56			112			42		0.02	0.2857	0.01	0.4286	0.015	0.2	0.0075	0.3	0.0185	0.1667	0.0111	0.25	0.2093	0.4667	0.1246	0.6667	0.0173	0.4375	0.0039	0.5	0.0039
98.5902	1	0	0	0	0	0	0	0	1	0	1	0	0								30.1			46			0.2		0.0674208	0.571429	0.0674208	0.571429	0.051067	0.6	0.051067	0.6	0.0592841	0.583333	0.0592841	0.583333	0.0174125	0.666667	0.0174125	0.666667	0.00710377	0.5	0.00710377	0.5	0.00710377
99.9667	1	1	1	0	0	0	0	0	0	1	1	0	0	0.43	1.1	9300	355	42	53	57	30.98	117.9	111	40	14.9		16.9	-1.8	0.521487	0.285714	0.41217	0.285714	0.590782	0.2	0.518554	0.2	0.738572	0.166667	0.655108	0.166667	0.82621	0.0666667	0.578593	0.133333	0.613014	0.0625	0.613014	0.0625	0.26115
100.197	0										1	0	0			1227	447	35	89	25	27.67			17	0.3		0.6		0.25	0.4286	0.53	0.1429	0.1904	0.3	0.4461	0.1	0.1567	0.25	0.3508	0.0833	0.286	0.1333	0.581	0.2	0.0415	0.1875	0.1256	0.25	0.0173
100.5	0	0	0	0	0	0	0	0	0	0	1	0	0								2.46		117	301	3.8		12.8		0.0075923	0.285714	0.0075923	0.285714	0.00750912	0.2	0.00750912	0.2	0.011055	0.166667	0.011055	0.166667	0.0173783	0.6	0.0173783	0.8	0.000480597	0.4375	0.000480597	0.6875	0.000480597
104.033	0	0	0	0	0	0	0	0	0	0	1	0	0	0.56	0.4		604		36	84	28.22	0.53	99	303	10.5		9.7		0.0110414	0.2857	0.0747441	0.285714	0.00963186	0.333333	0.141244	0.2	0.0120845	0.166667	0.338394	0.166667	0.0314013	0.333333	0.0467528	0.333333	0.00118125	0.375	0.0128688	0.3125	0.00118125
104.689	0										1	0	0			476	176	31	61	49	11.32			77	0.1		0.2		0.334033	0.428571	0.334033	0.428571	0.469513	0.3	0.469513	0.3	0.721525	0.25	0.721525	0.25	0.367141	0.466667	0.367141	0.466667	0.26115	0.4375	0.26115	0.4375	0.125648
108.492	0										1	0	0								22.64			49			0.2		0.0747441	0.428571	0.334033	0.428571	0.141244	0.3	0.469513	0.3	0.338394	0.25	0.721525	0.25	0.0371655	0.466667	0.141183	0.666667	0.323004	0.4375	0.162465	0.5625	0.323004
108.633	0										1	0	0	0.61	0.62						14.06			228			11
111.133	1	0	0	0	0	0	0	0	0	0	1	0	0	0.59	0.43	352	1213	85	32	94	28.55	32.5		229			12		0.03	0.2857	0.03	0.4286	0.032	0.2	0.028	0.3	0.0299	0.1667	0.0288	0.25	0.0059	0.4	0.0048	0.5333	0.0016	0.4375	0.0005	0.5	0.0005
112.4	0	0	0	0	0	0	0	0	0	0	1	0	0	0.54	1.15	568		78	35	91	26.43			176	13.9		17.1		0.01	0.7143	0.01	0.7143	0.0083	0.8	0.0083	0.8	0.0113	0.8333	0.0113	0.8333	0.0058	0.6	0.0058	0.6	0.0009	0.5625	0.0009	0.5625	0.0009
113.8	1	1	0	1	1	0	0	0	0	0	1	0	0	0.61		35000	309	56	104	43	27.54	5.64		52			9.3	5	0.04	0.2857	0.04	0.2857	0.0448	0.2	0.0382	0.2	0.0391	0.1667	0.0352	0.1667	0.0446	0.4	0.2311	0.4667
114.1	0	1	0	0	0	0	0	0	0	0	1	0	0	0.44	0.71	1736	652	88	38	64	9.33			113			14.8		0.01	0.4286	0.01	0.4286	0.0075	0.3	0.0075	0.3	0.0111	0.25	0.0111	0.25	0.0047	0.5333	0.0047	0.5333	0.0009	0.5	0.0009	0.5	0.0009
119.574	1										1	0	0								40.37			9			0.1		0.357783	0.285714	0.485004	0.285714	0.486915	0.2	0.573562	0.2	0.724304	0.166667	0.762052	0.166667	0.262503	0.466667	0.134587	0.266667	0.162465	0.375	0.162465	0.25	0.162465
120.885	0	0	0	0	0	0	0	0	1	0	1	0	0			651	687	99	32	97	10.06			59	0		0.2		0.057595	0.285714	0.0532015	0.285714	0.045922	0.2	0.0435383	0.2	0.0560644	0.166667	0.054943	0.166667	0.015604	0.333333	0.019124	0.266667	0.000480597	0.25	0.00710377	0.25	0.000480597
121.933	1	1	0	0	1	0	0	0	0	1	1	0	0	0.25		1847	465	96	33	88	16.13	0.39	109	256	19.3		23.2		0.0586902	0.285714	0.0586902	0.285714	0.0453602	0.2	0.0453602	0.2	0.0381956	0.166667	0.0381956	0.166667	0.112047	0.266667	0.112047	0.266667	0.00215029	0.25	0.00215029	0.25	0.00118125
122.267	1	0	0	1	0	0	0	0	0	1	1	0	0	0.52	1.06		303		50	74	43.45			5			0.4	0.6	0.06	0.2857	0.05	0.2857	0.0478	0.2	0.0391	0.2	0.0541	0.1667	0.0536	0.1667	0.0157	0.2667	0.093	0.4667
123	1	0	0	0	1	1	1	1	0	0	1	0	0		14.62		394	56	44	68	15.51			139	23.5		28.3	-0.1
123.233	1	0	0	0	0	1	1	0	1	1	0	0	1	0.43	1.32	4919	348	45	66	30	34.82	4.4	75	9			0.1		0.0170736	0.285714	0.00996166	0.285714	0.0226054	0.2	0.0158377	0.2	0.0375705	0.166667	0.0320135	0.166667	0.0234078	0.266667	0.0632098	0.266667	0.0310685	0.3125	0.0172932	0.3125	0.00159386
123.867	0	0	0	0	0	0	0	0	1	1	1	0	0	0.4	2.8	2142	367	28	61	68	14.05	96.52	141	7			0.3	5.3	0.153813	0.285714	0.0818855	0.285714	0.134005	0.2	0.0582662	0.2	0.13068	0.166667	0.0654157	0.166667	0.0922054	0	0.0284983	0	0.0172932	0.0625	0.0232029	0.0625
125.6	1	0	0	0	0	0	1	0	0	0	1	0	0	1.56							9.61	1.66		181			6.1		0.01	0.2857	0.01	0.4286	0.0199	0.2	0.0075	0.3	0.0207	0.25	0.0111	0.3333	0.0157	0.2	0.0157	0.4	0.0096	0.25	0.0039	0.375	0.0096
125.733	0	0	0	0	0	0	0	0	0	0	1	0	0			278	686	80	39	82	18.41			246			33.4		0.01	0.4286	0.01	0.4286	0.0075	0.3	0.0075	0.3	0.0111	0.25	0.0111	0.25	0.0152	0.5333	0.0152	0.5333	0.0012	0.4375	0.0012	0.4375	0.0012
131.7	0	0	0	0	0	0	0	0	0	0	1	0	0	0.57							0.75		150	508	5.4		12.2		0.0075923	0.285714	0.0075923	0.285714	0.00750912	0.2	0.00750912	0.2	0.011055	0.166667	0.011055	0.166667	0.0187479	0.533333	0.0187479	0.533333	0.000480597	0.4375	0.000480597	0.4375	0.000480597
132.367	1	1	0	0	1	1	0	0	0	1	1	0	0	0.31		1101	463	73	31	100	17.68	0.9	97	145	26.8		28.6		0.274881	0.285714	0.274881	0.285714	0.0447599	0.2	0.0447599	0.2	0.037681	0.166667	0.037681	0.166667	0.107168	0.266667	0.107168	0.266667	0.00159386	0.25	0.00159386	0.25	3.34144e-134
134.533	1	0	0	0	0	0	0	0	1	0	1	0	0	0.45	1.17		537	60	43	65	26.8			18			0.7	-1	0.01	0.2857	0.01	0.4286	0.0089	0.2	0.0075	0.3	0.0116	0.1667	0.0111	0.25	0.0271	0.2667	0.0065	0.3333
134.82	1	0	0	0	0	0	0	0	0	1	0	0	0			35000	283	50	47	73	30.08			15	32.3		41.1		0.399752	0.142857	0.107321	0.142857	0.369223	0.1	0.182941	0.1	0.24893	0.0833333	0.0997314	0.0833333	0.248057	0.133333	0.125978	0.133333	0.742691	0.125	0.539915	0.0625	0.742691
135.9	0	0	1	0	1	0	1	1	0	1	1	0	0	0.51	1.05		468	107		67	29.1		86	210			16.6		0.0961026	0.142857	0.0453472	0.428571	0.0674711	0.1	0.0300349	0.3	0.0438173	0.0833333	0.00950996	0.25	0.53544	0.2	0.00635587	0.4	0.0172932	0.125	0.00710377	0.3125	0.0172932
137.167	0	0	1	0	1	0	0	0	0	0	1	0	0	0.43	0.27	1421	496	75	38	82	11.15			121			3.9	4.4	0.22	0	0.12	0	0.0762	0	0.3704	0	0.0749	0	0.1878	0	0.0077	0	0.1761	0.0667
140.852	1	0	0	0	0	0	0	0	1	0	1	0	0								22.63			21			0.6		0.0991236	0.285714	0.0127675	0.285714	0.0664094	0.2	0.0106094	0.2	0.0744638	0.166667	0.0128864	0.166667	0.00412523	0.266667	0.0212379	0.466667	0.00159386	0.25	0.00710377	0.375	0.00159386
142.167	0	0	0	0	0	0	0	0	0	0	1	0	0	0.62		95	306	106	36	89	0.72			200			5.8		0.01	0.2857	0.01	0.2857	0.0077	0.2	0.0077	0.2	0.0111	0.1667	0.0111	0.1667	0.014	0.4667	0.014	0.4667	0.0009	0.4375	0.0009	0.4375	0.0009
143.267	0	0	0	0	0	0	0	0	1	0	1	0	0	0.31	0.45	3007	873	41	79	51	33.52	22.92		4			0.7	0.7	0.07	0.1429	0.05	0.4286	0.0666	0.1	0.0391	0.3	0.0752	0.0833	0.0536	0.25	0.2138	0.1333	0.0881	0.5333					0.0039
144.933	1	0	1	0	1	0	0	0	0	1	0	0	0	0.74	0.7	26.936	115	49	200	10	13.38	4.61	75	59	13.1		159	-4	0.0239862	0.142857	0.0239862	0.142857	0.0129548	0.1	0.0129548	0.1	0.0501741	0.0833333	0.0501741	0.0833333	0.0140636	0	0.0140636	0	0.0731012	0.0625	0.0731012	0.0625	0.00215029
145.2	0	0	0	0	0	0	0	0	0	0	1	0	0	0.54	0.18	264	511	90	32	100	3.9			298	13.1		14.8		0.01	0.4286	0.01	0.4286	0.0075	0.3	0.0075	0.3	0.0111	0.25	0.0111	0.25	0.0138	0.6	0.0138	0.6	0.0012	0.5	0.0012	0.5	0.0012
146.067	0	0	0	0	0	0	0	0	0	1	1	0	0	0.72		18091	423	50	99	62	31.72	3.91	99	136	8.9		11.9		0.0119524	0.142857	0.0521042	0.285714	0.0121542	0.1	0.0418706	0.2	0.0142422	0.0833333	0.0353816	0.166667	0.0257308	0.133333	0.03842	0.133333	0.00087536	0.0625	0.00215029	0.0625
146.667	1	0	0	0	0	0	0	0	0	0	1	0	0	0.62		418	680	72	39	72	25.21			152	14.8		17.1		0.01	0.4286	0.01	0.4286	0.0075	0.3	0.0075	0.3	0.0111	0.25	0.0111	0.25	0.0137	0.5	0.0137	0.5	0.0009	0.5625	0.0009	0.5625	0.0009
147.067	0	0	1	0	0	0	0	0	1	0	1	0	0	0.41							17.5
148.733	0	0	0	0	1	0	0	0	0	1	1	0	0	0.56	0.56	12679	812	51	47	54	34.03	174.4	106	103	1.4		2.3	0.8	0.00878401	0.285714	0.029029	0.285714	0.00827301	0.2	0.028334	0.2	0.0110004	0.166667	0.028878	0.166667	0.013789	0	0.0561999	0.0666667	0.00290041	0.0625	0.00710377	0.0625
149.533	1	0	0	0	0	0	0	0	1	0	1	0	0	0.44	4.26	6257	115	71	34	94	3.02		108	19	0.7		5.8		0.0674208	0.285714	0.0674208	0.285714	0.00990168	0.2	0.00990168	0.2	0.0122876	0.166667	0.0122876	0.166667	0.0308585	0.266667	0.0308585	0.266667
150.295	0									1	1	0	0								9.24	0.37							0.0075923	0.428571	0.0075923	0.428571	0.00750912	0.3	0.00750912	0.3	0.011055	0.25	0.011055	0.25	0.00393657	0.466667	0.00393657	0.466667	0.00118125	0.4375	0.00118125	0.4375	0.00118125
151.167	0	0	1	0	0	0	0	0	0	0	1	0	0	0.62		320	664	80	45	51	18.88			140			15.8		0.02	0.4286	0.02	0.4286	0.0122	0.3	0.0122	0.3	0.0145	0.25	0.0145	0.25	0.0148	0.6	0.0148	0.6	0.0009	0.5	0.0009	0.5	0.0009
151.2	1	0	0	0	0	0	0	0	0	0	1	0	0	0.75		367	660		31	104	13.6			185			10.3	-4.8	0.01	0.5714	0.01	0.5714	0.0075	0.4	0.0075	0.4	0.0111	0.3333	0.0111	0.3333	0.005	9	0.0139	0.6667
154.7	0	0	0	0	1	0	0	0	0	1	1	0	0	0.81	1.43	1047	884	54	39	106	17.79	17.85		101			5.4		0.03	0.2857	0.01	0.5714	0.0288	0.2	0.0075	0.4	0.0294	0.1667	0.0111	0.3333	0.005	0.4667	0.0022	0.5	0.0022	0.4375	0.0022	0.4375	0.0022
155	0										1	0	0	0.59			457	84	34	80	25.76			483			5.9
157.733	0	0	0	0	0	0	0	0	0	1	1	0	0	0.55							6.97		130	330	4.7		7.9		0.0284429	0.285714	0.0284429	0.285714	0.0279524	0.2	0.0279524	0.2	0.0288195	0.166667	0.0288195	0.166667	0.0296844	0.533333	0.0296844	0.533333	3.34144e-134	0.4375	3.34144e-134	0.4375
161.067	0	1	0	0	1	0	0	0	0	0	1	0	0	0.36	0.44	348	840	83	33	102	28.43			109			7.2	-1	0	0.5714	0	0.5714	0.0011	0.4	0.0011	0.4	0.0065	0.3333	0.0065	0.3333	0.0055	0.6	0.003	0.6			0.0016	0.625
163.9	1	0	0	0	0	0	0	0	1	0	0	0	0	0.37		9184	515	104	44	87	31.9	4.62		37			0.1	3.8	0.05	0.5714	0.05	0.5714	0.0391	0.4	0.0391	0.4	0.0536	0.3333	0.0536	0.3333	0.0197	0.6	0.0242	0.7333					0.0071
163.967	1	1	0	0	0	0	0	0	0	1	1	0	0	0.89	0.42	34181	456	37	81	45	29.97	42.18	89	54	14.7	947.7	21.8	16.8	0.0268049	0.285714	0.0167083	0.285714	0.0870459	0.2	0.0647004	0.2	0.107565	0.166667	0.0723821	0.166667	0.865879	0.0666667	0.552061	0			0.0731012	0.0625
164.433	1	0	0	0	1	1	0	0	0	0	1	0	0	0.67	0.23	235	336	117	29	94	0.1		140	303	2.6		5.9		0.00896875	0.285714	0.00896875	0.285714	0.00838825	0.2	0.00838825	0.2	0.0113463	0.166667	0.0113463	0.166667	0.00845925	0.2	0.00845925	0.2	0.000480597	0.25	0.000480597	0.25	0.000480597
166.1	0	1	0	0	0	0	1	0	0	1	1	0	0	0.71	1.11	3592	623	60	38	61	22.28			54			7.8	0.6	0.01	0.4286	0.01	0.4286	0.0075	0.3	0.0075	0.3	0.0111	0.25	0.0111	0.25	0.164	0.0667	0.0651	0.1333
167.567	1	0	0	0	0	0	0	0	0	1	1	0	0	0.59							2.17	0.06	130	167	3.6		5		0.0075923	0.285714	0.0075923	0.285714	0.00750912	0.2	0.00750912	0.2	0.011055	0.166667	0.011055	0.166667	0.0282776	0.466667	0.0282776	0.466667
168.267	1	1	0	0	0	0	0	0	0	0	1	0	0	0.96		531	532	69	49	37	28.03	21.86		130	25.1		28.8		0.01	0.2857	0.01	0.2857	0.0112	0.2	0.0112	0.2	0.0135	0.1667	0.0135	0.1667	0.0124	0.4667	0.0124	0.4667	0.0022	0.4375	0.0022	0.4375	0.0022
168.667	1	0	0	0	0	0	0	1	0	0	1	0	0	0.69	5.39		582		30	101	10.08			115	1.2		2.8	-1.7	0.01	0.2857	0.01	0.2857	0.0109	0.2	0.0109	0.2	0.0132	0.1667	0.0132	0.1667	0.0161	0.3333	0.0161	0.3333
169.9	0	0	0	0	0	0	0	0	1	1	0	0	0	0.56	3.45		458		37	61	34.77	1.82	83	11	1.2		1.5	0.5	0.018542	0.428571	0.00996166	0.428571	0.0087034	0.3	0.00574422	0.3	0.00889316	0.25	0.00720707	0.25	0.060768	0.2	0.00659386	0.133333			0.125648	0.1875
169.933	0	0	0	0	0	0	0	0	0	0	1	0	0	1.41	0.32	2348	712	94	82	41	28.21			78			27.1		0.01	1	0.01	1	0.0075	1	0.0075	1	0.0111	1	0.0111	1	0.0081	0.6667	0.0081	0.6667	0.0173	0.5625	0.0173	0.5625	0.0173
171.3	1	1	0	0	1	1	1	1	0	0	0	0	1	0.97	28.49	488	256	43	59	54	15.12			53			10.3	-5.4	0	0.2857	0	0.5714	0.0226	0.2	0.0158	0.4	0.0422	0.1667	0.032	0.3333	0.0124	0.4	0.0747	0.6	0	0.375			0
178.262	1	0	0	0	0	0	1	0	1	0	1	0	0								35.81			21			0.2		0.0818855	0.428571	0.0818855	0.428571	0.0582662	0.3	0.0582662	0.3	0.0654157	0.25	0.0654157	0.25	0.00342405	0.466667	0.00342405	0.466667	0.0172932	0.4375	0.0172932	0.4375	0.00391117
179.77	1										0	0	0			4067	187	19	132	40	12.86	16.72		5			0.2		0.05	0.2857	0.11	0.1429	0.0391	0.2	0.1304	0.1	0.0536	0.1667	0.1226	0.0833	0.1088	0.2667	0.5285	0.2	0.0731	0.3125	0.5399	0.25	0.0415
180.333	1	1	0	0	1	1	0	0	0	1	1	0	0	0.32		1337	576	54	44	60	34.07	63.84	81	215	6.8		11.5	-0.2	0.00359772	0.142857	0.0072823	0.428571	0.00508	0.1	0.00454171	0.3	0.00919778	0.0833333	0.00389038	0.25	0.0398105	0.133333	0.0476523	0.133333	0.00215029	0.0625	0.00290041	0.125
180.8	0	1	0	1	0	0	0	0	1	0	0	0	0	1.15	19.46	260	334	59	168	45	20	183.06		36			1.2	-1	0.28	0	0.24	0.2857	0.0871	0	0.073	0.2	0.039	0	0.0371	0.1667	0.2075	0.0833	0.0186	0.2667
182.167	0	1	1	0	1	0	0	0	0	1	1	0	0	0.71	1.1	> 35200	335	41	55	29	13.16	258.28	112	105			8.2	3.3	0.0321396	0.285714	0.062269	0.285714	0.0303188	0.2	0.0472072	0.2	0.0293183	0.166667	0.039859	0.166667	0.0480624	0.0666667	0.176972	0	0.125648	0.0625	0.323004	0.0625
182.667	1	1	0	0	0	0	0	0	0	0	1	0	0	0.71		1136	646	64	38	66	21.81			227			14.4	-2	0.06	0	0.01	0	0.0201	0	0.0038	0	0.0435	0	0.0141	0	0.0392	0.0667	0.0478	0.1333	0.0232	0.0625	0.0029	0.125	0.0053
182.984	0	0	1	0	0	0	0	0	0	0	1	0	0			834	719	76	47	63	31.31			306			16.6		0.0127675	0.285714	0.00878401	0.285714	0.0106094	0.2	0.00827301	0.3	0.0128864	0.166667	0.0110004	0.25	0.0696551	0.133333	0.281709	0.133333	0.00956532	0.125	0.00159386	0.125	0.00956532
183.902	1										1	0	0								15.21			127			8.4		0.09	0.4286	0.05	0.5714	0.063	0.3	0.0391	0.4	0.0419	0.25	0.0316	0.3333	0.0321	0.5333	0.0143	0.8	0.0129	0.4375	0.0009	0.75	0.0071
184.533	0	0	1	0	0	0	1	1	0	0	1	0	0	4.19		791	547	81	54	75	8.08	130.7		202			7.2	-14.2	0.05	0.5714	0.05	0.5714	0.0391	0.4	0.0391	0.4	0.0111	0.3333	0.0111	0.3333	0.0117	0.6667	0.0117	0.6667	0.0022	0.5625	0.0129	0.5625	0.0022
184.533	0	0	0	0	0	0	1	0	0	0	1	0	0	4.29			547	81	54	75	8.08			220			7.2		0	0.2857	0	0.2857	0.0011	0.2	0.0011	0.2	0.0027	0.1667	0.0027	0.1667	0.0074	0.5333	0.0074	0.5333	0.0129	0.5	0.0129	0.5	0.0022
184.633	1	0	0	0	0	0	0	0	0	0	1	0	0	0.81	0.48	571	703	56	39	89	39.26			100			27.6		0.01	1	0.01	1	0.0075	1	0.0075	1	0.0111	12	0.0111	12	0.0171	0.8	0.0171	0.8	0.0039	0.625	0.0039	0.625	0.0022
185.2	0	1	0	0	1	0	1	0	0	0	1	0	0	2.07	0.49	16239	361	52	80	64	23.06	106.02		52	0.4		0.9	-2.4	0.01	0.5714	0.01	0.5714	0.0075	0.4	0.0075	0.4	0.0111	0.3333	0.0111	0.3333	0.0392	0.3333	0.0117	0.4
185.633	0	0	1	0	0	0	0	0	0	0	1	0	1	2.05	1.23	3064	564	104	52	81	57.42	15.76		175	7		10.7	-2.7	0.47	0	0.15	0.4286	0.3749	0	0.134	0.3	0.3268	0	0.1307	0.25	0.0478	0.0667	0.0855	0.2
186.167	0	0	0	0	1	0	0	0	1	0	1	0	0	1.58		326	761	55	58	76	32.24			12			0.1		0.01	0.5714	0.01	0.7143	0.0158	0.4	0.0158	0.5	0.032	0.3333	0.032	0.4167			0.0186	0.7333
187.1	0	0	0	0	0	0	1	0	0	0	1	0	0	0.76	0.82	295	486	63	49	49	23.66	85.88		141			20.3		0.01	0.5714	0.01	0.5714	0.0117	0.7	0.0117	0.7	0.014	0.75	0.014	0.75	0.0207	0.66667	0.0207	0.6667	0.0022	0.5	0.0022	0.5	0.0022
187.133	1	0	0	0	0	0	1	1	0	0	1	0	0	5.02	11.94		166	30	63	56	3.13		83	87	3.1		4.4		0.00222069	0.142857	0.00237324	0.142857	0.0195334	0.1	0.0204144	0.1	0.0348324	0.0833333	0.0358335	0.0833333	0.0315232	0	0.0693317	0	0.0172932	0.0625	0.0172932	0.0625	0.00391117
187.467	0	0	0	0	1	0	1	0	1	0	0	0	0	0.53	1.91	7412	1053	85	69	43	51.7	14.91	95	24			0.1		0.0803205	0.285714	0.0472005	0.428571	0.0953365	0.2	0.0674334	0.3	0.109386	0.25	0.0843192	0.25	0.0140221	0.0666667	0.021062	0.266667	0.0414871	0.0625	0.125648	0.1875	0.00391117
188.967	1	0	0	0	0	0	0	0	0	0	1	0	0								6.82		122	187	3.7		11.4		0.0075923	0.285714	0.0075923	0.285714	0.00750912	0.2	0.00750912	0.2	0.011055	0.166667	0.011055	0.166667	0.0113178	0.8	0.0113178	0.8	0.00087536	0.5625	0.00087536	0.6875	0.00087536
190.733	1	0	0	0	0	0	0	0	0	0	1	0	0	0.7							4.05		132	277	8.4		12.7		0.0075923	0.285714	0.0075923	0.285714	0.00750912	0.2	0.00750912	0.2	0.011055	0.166667	0.011055	0.166667	0.0112619	0.533333	0.0112619	0.533333	3.34144e-134	0.4375	3.34144e-134	0.4375
193.533	0	0	0	0	0	0	0	0	0	0	1	0	0	0.94	1.6	4304	351	90	49	47	14.33		131	93	13.9		7.9		0.031923	0	0.031923	0	0.0499273	0	0.0499273	0	0.0352173	0	0.0352173	0	0.00736225	0	0.00736225	0	0.00159386	0.0625	0.00159386	0.0625	0.00159386
193.9	0	0	0	0	0	0	0	0	0	1	1	0	0	1.06		2013	797	84	34	82	28.04	3.63	124	179	11.4		12.9		0.0201144	0.285714	0.0201144	0.285714	0.0143656	0.2	0.0143656	0.2	0.0175561	0.166667	0.0175561	0.166667	0.030472	0.333333	0.030472	0.333333
194.933	1	1	0	0	0	0	0	0	0	0	1	0	0	0.91		1600	788	81	35	70	43.23	69.96		132	16		17.5		0.01	0.2857	0.01	0.2857	0.0075	0.2	0.0075	0.2	0.0111	0.1667	0.0111	0.1667	0.0244	0.3333	0.0244	0.3333	0.0053	0.3125	0.0053	0.3125	0.0022
195.333	0	0	1	0	1	0	0	0	0	0	1	1	0	0.91	0.38		324	38	59	48	4.83	16.09		194	50.2		55.8	1.5	0.03	0.4286	0.03	0.4286	0.028	0.3	0.028	0.3	0.0288	0.25	0.0288	0.25	0.0058	0.5333	0.0058	0.5333	0	0.5	0	0.5	0
197.367	0	1	1	0	0	0	0	0	0	1	1	0	0	1.15			563	75	45	74	24.93	0.4	124	330	8.1		10.6		0.00915734	0.285714	0.0075923	0.285714	0.00850508	0.2	0.00750912	0.2	0.0114007	0.166667	0.011055	0.166667	0.0245545	0.6	0.0245545	0.333333	3.34144e-134	0.4375
197.667	0	0	0	0	0	0	0	0	1	0	0	0	0	3.07	8.46	4333	120	22		16	9.51			21			0	-13.1	0.26	0.2857	0.26	0.2857	0.1952	0.2	0.1952	0.2	0.169	0.1667	0.169	0.1667	0.6149	0.2	0.6149	0.2	0.323	0.25	0.323	0.25	0.5399
198.033	0	0	0	0	0	0	0	0	1	0	1	0	0	0.75	1	1123	8920	66	49	1.3	39.2	65.22	97	120			0.1		0.0370762	0.285714	0.153813	0.285714	0.0576384	0.2	0.134005	0.2	0.0807085	0.166667	0.13068	0.166667	0.00584678	0.266667	0.00584678	0.266667	0.0172932	0.3125	0.00527231	0.3125	0.00391117
200.067	0	0	0	0	0	0	0	0	1	0	0	0	0	0.57	0.62	11819	1012	72	43	78	41.54			24			6.9	-2.6	0.05	0.5714	0.17	0.4286	0.0391	0.4	0.1614	0.3	0.0536	0.3333	0.1475	0.25	0.0195	0.7333	0.0292	0.5333	0.0029	0.75	0.0311	0.5	0.0016
200.3	1	0	0	0	0	0	0	0	1	0	1	0	0	0.41	0.4	903	274	33	56	64	29.57	13.03	85	30			0.2		0.0181637	0.285714	0.0181637	0.285714	0.0235488	0.2	0.0235488	0.2	0.0388217	0.166667	0.0388217	0.166667	0.00311937	0.2	0.00311937	0.2	0.0172932	0.25	0.0172932	0.25	0.0172932
200.433	0	1	0	0	0	0	0	0	0	1	1	0	0	0.83		1445	379		37	72	13.4	97.15	130	176	8.4		10.1		0.0122488	0.285714	0.0110414	0.285714	0.0103205	0.2	0.00963186	0.2	0.0126307	0.166667	0.0120845	0.166667	0.0107186	0.466667	0.0241978	0.466667
201.133	0	0	0	0	0	0	0	0	0	0	1	0	0	1.2			204		29	74	1.35		142	140	1.6		11.6		0.0075923	0.285714	0.0075923	0.285714	0.00750912	0.2	0.00750912	0.2	0.011055	0.25	0.011055	0.25	0.0106657	0.4	0.0106657	0.4
201.7	0	0	0	1	0	0	0	0	0	1	1	0	0	1.4		742	1012	70	40	58	24.09	40.35		159	8.4		9.3		0.01	0.2857	0.01	0.2857	0.008	0.2	0.008	0.2	0.012	0.1667	0.012	0.1667	0.037	0.3333	0.037	0.3333
202.3	0	1	0	0	0	0	0	0	0	0	1	0	0	0.74		2780	453	75	39	63	24	14.39	130	205	20.7		23.5		0.00183477	0.285714	0.00183477	0.285714	0.00324109	0.2	0.00324109	0.2	0.00660116	0.166667	0.00660116	0.166667	0.0239628	0.266667	0.0239628	0.266667	0.000480597	0.25	0.000480597	0.25	0.000480597
202.59	1										0	0	0			11987	449	42	64	42	16.15			19			0.1		0.25	0.2857	0.15	0.5714	0.1904	0.2	0.134	0.4	0.1567	0.1667	0.1307	0.3333	0.0127	0.4	0.0156	0.4	0.0415	0.375	0.0962	0.5	0.0012
202.7	0	1	0	0	1	0	0	0	0	0	1	1	0	0.6	0.55		928	71	49	44	14.73			319			15.2	0
203.467	1	0	0	0	0	0	0	0	0	0	1	0	0	0.97							1.99		146	148	3.7		12.2		0.00954639	0.285714	0.00954639	0.285714	0.00874361	0.2	0.00874361	0.2	0.0115219	0.166667	0.0115219	0.166667	0.0105607	0.533333	0.0105607	0.533333	0.00087536	0.4375	0.00087536	0.4375	0.00087536
206.467	0	1	0	0	0	0	0	0	0	0	1	0	0	0.69	0.44						19.18			95			19.18
207.467	0	0	0	0	0	0	0	0	0	0	1	0	0	0.98	1.42		770	50	56	56	34.88	45.79		63			27	5.3	0.04	0.2857	0.04	0.2857	0.054	0.2	0.048	0.2	0.0442	0.1667	0.0409	0.1667	0.0191	0.3333	0.0084	0.3333	0.0173	0.25	0.0173	0.25	0.0173
208.367	0	0	0	0	0	0	0	0	1	0	0	0	1	1.45	7.87	8037	513	60	60	69	30.87			23	29.4		32.7	-1.4	0.01	0.4286	0.05	0.4286	0.0182	0.3	0.0657	0.3	0.0332	0.25	0.0834	0.25	0.0286	0.2	0.052	0.2	0.2611	0.1875	0.4651	0.1875
208.754	1	0	0	0	0	0	0	0	1	0	1	0	0				632	73	36	84	30.66			81	3.26		4.4		0.0075923	1	0.0075923	1	0.00750912	1	0.00750912	1	0.011055	1	0.011055	1	0.0186515	0.733333	0.0186515	0.733333	0.00159386	0.5625	0.00159386	0.5625	0.00159386
210.233	0	1	1	1	0	0	0	0	0	0	1	1	0	0.68	1		685	97	29	77	19.64	0.23		310			14.4		0.04	0.2857	0.03	0.4286	0.0401	0.2	0.028	0.3	0.0364	0.1667	0.0288	0.25	0.0056	0.4667	0.003	0.4667	0.0029	0.5	0	0.5	0.0005
210.233	0	1	0	0	1	0	0	0	0	0	1	0	0	0.68	1		685	97	29	77	19.64	0.23		310			14.4	3	0.04	0.2857	0.01	0.4286	0.0401	0.2	0.0089	0.3	0.0364	0.1667	0.0123	0.3333	0.0045	0.3333	0.0102	0.4	0.0005	0.25	0.0012	0.25	0.0005
210.633	0	0	1	0	0	0	0	0	0	0	1	0	0	0.54	0.87						20.72			143			12.2	3.8	0	0.2857	0	0.2857	0.0058	0.2	0.0058	0.2	0.65	0.1667	0.65	0.1667	0.0019	0.4667	0.0019	0.4667	0.0009	0.5	0.0009	0.5	0.0009
210.767	1	0	0	0	0	0	0	0	0	1	1	0	0	0.56	0.43		484	69	39	60	24.94	14.39	111	113			16.3	-2.1	0.0075923	0.428571	0.0075923	0.428571	0.00750912	0.3	0.00750912	0.3	0.011055	0.25	0.011055	0.25	0.00296769	0.333333	0.00296769	0.333333	0.00087536	0.25	0.00087536	0.25	0.00087536
210.767	1	1	0	1	0	0	1	0	0	0	1	0	0	1.05		6011	785	63	28	68	20.64	31.31	80	126	3.5		4.1		0.0075923	0.285714	0.0147595	0.285714	0.00750912	0.2	0.0116849	0.2	0.011055	0.166667	0.0139706	0.166667	0.0344563	0.2	0.0420474	0.266667	0.0172932	0.25	0.00527231	0.25	0.00527231
210.933	1	0	0	0	0	0	0	0	0	0	1	0	0	1.16		4318	539	77	35	78	31.61			43	2.7		3.1		0.01	0.5714	0.02	0.4286	0.0075	0.4	0.015	0.3	0.0111	0.3333	0.0185	0.25	0.0127	0.5333	0.0156	0.5333
211.7	0	1	0	0	0	0	0	0	0	1	1	0	0	2.35		2105	564	76	28	74	27.96	2.81	80	322	6.5		8.7		0.0108144	0.285714	0.0108144	0.285714	0.0094997	0.2	0.0094997	0.2	0.0119903	0.166667	0.0119903	0.166667	0.0124562	0.266667	0.0124562	0.266667	0.00215029	0.3125	0.00215029	0.3125	0.00215029
212.525	0										1	0	0								20.26			391	3.4		4.6		0.05	0.4286	0.05	0.5714	0.0396	0.3	0.0391	0.4	0.0537	0.25	0.0536	0.3333	0.003	0.2667	0.0234	0.4667	0.0005	0.25	0.0005	0.375	0.0005
214.167	1	1	0	0	0	0	0	0	0	1	1	0	0			16609	401	76	32	1.2	20.03	18.11	108	239			10.5		0.0112731	0.285714	0.0119973	0.285714	0.00976585	0.2	0.010179	0.2	0.0121836	0.166667	0.012511	0.166667	0.0225988	0.466667	0.0225988	0.466667
215.7	0	0	0	0	0	0	0	0	1	0	1	0	0	0.44	1	546	293	63	47	73	15.8			11	0.3		0.3	8.1	0.05	0.2857	0.05	0.4286	0.0435	0.2	0.0391	0.3	0.0534	0.1667	0.0536	0.25	0.0104	0.2667	0.0056	0.4667
215.733	0	0	0	0	0	0	0	0	1	0	1	0	0	0.46	1.7	461	328	24	124	74	29.12	46.69		13			0.2	4	0.04	0.1429	0.04	0.1429	0.0382	0.1	0.0382	0.1	0.0569	0.0833	0.0569	0.0833	0.0725	0.0667	0.0725	0.0667	0.1625	0.125	0.1625	0.125	0.0415
217.933	0	0	0	0	0	0	0	0	1	1	1	0	0	0.96	0.47	673	597	66	50	67	8.19		75	13			0.2		0.0106026	0.2857	0.0120092	0.285714	0.0165034	0.2	0.0179183	0.2	0.0318835	0.1667	0.0329928	0.166667	0.00985376	0.4	0.00286591	0.266667	0.0414871	0.3125	0.00710377	0.25	0.0414871
	0	0	0	0	0	0	0	0	1	0	1	0	0			472	420	45	48	64	18.33			27			1.4		0.0453472	0.428571	0.0453472	0.428571	0.0391206	0.3	0.0391206	0.3	0.0535927	0.25	0.0535927	0.25	0.00970848	0.6	0.00426517	0.6	0.0172932	0.5	0.0731012	0.5	0.0172932
	0	1	0	0	0	0	0	0			1	0	0								0.07
[truncated: 11 more columns]
