# Supplementary material for: Comparison of pediatric scoring systems for mortality in septic patients and the impact of missing information on their predictive power: a retrospective analysis
Source: PeerJ journal article supplement (doi:10.7717/peerj.9993), 2020-10-05

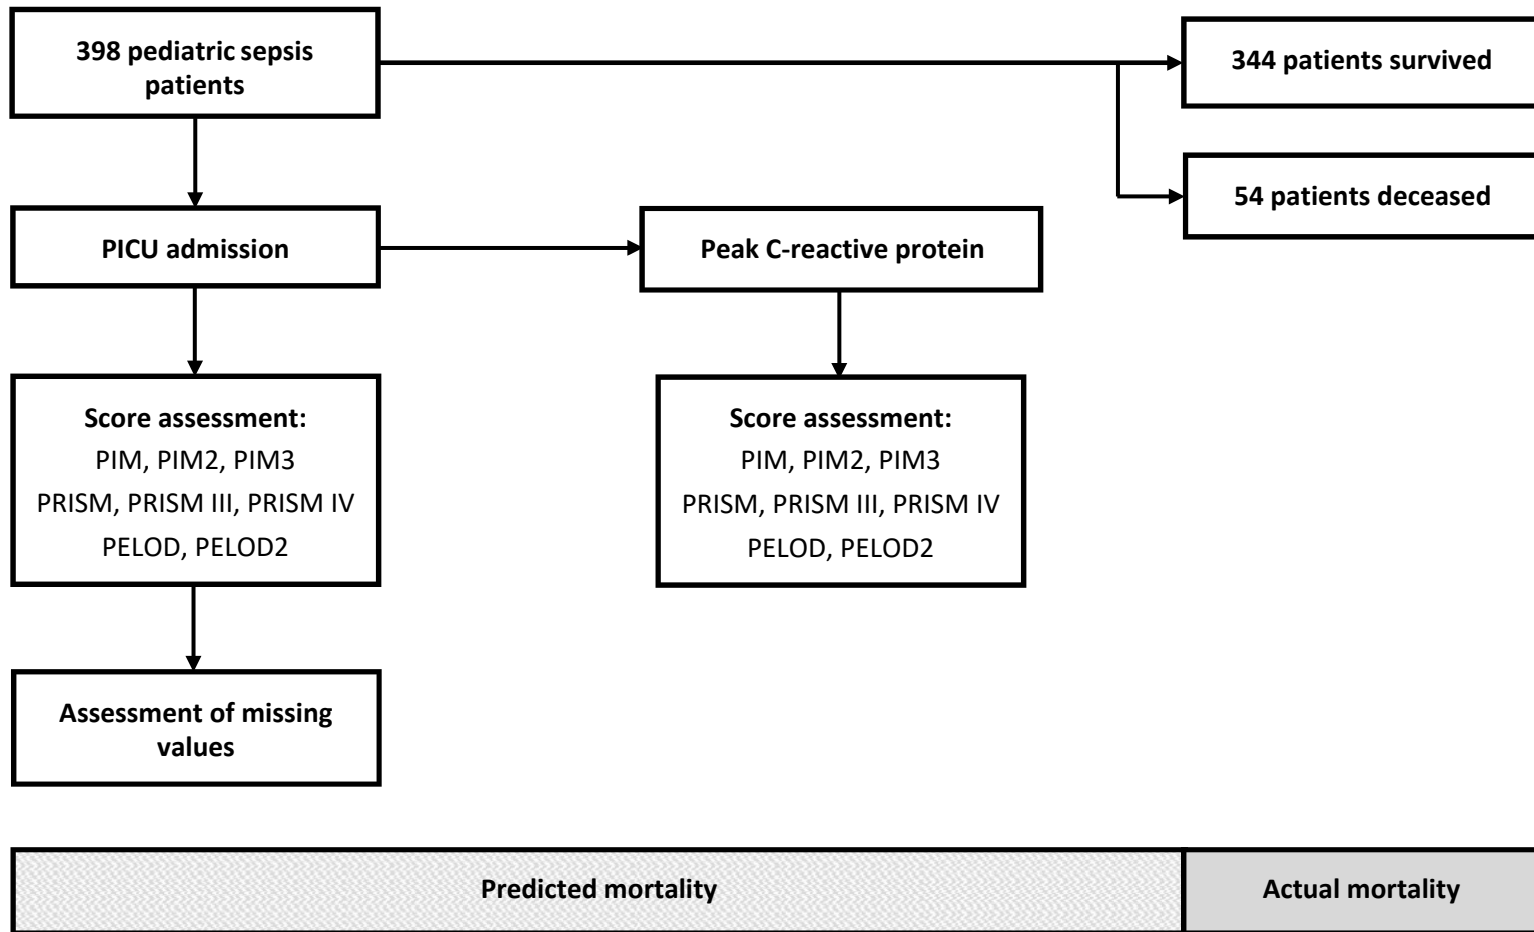

Supplement: Supplemental_File_1_Flow_Chart.pdf [file Supplemental_File_1_Flow_Chart.pdf]
